# Supplementary material for: Gold-catalyzed intramolecular cyclization/condensation sequence: synthesis of 1,2-dihydro[c][2,7]naphthyridines
Source: Royal Society of Chemistry journal article supplement (doi:10.1039/c7ob01285c), 2017-01-01
Supplement: c7ob01285c1.pdf [file c7ob01285c1.pdf]

## Supporting Information for

### Gold-catalyzed Intramolecular Cyclization/Condensation Sequence: Synthesis of 1,2-Dihydro[*c*][2,7]naphthyridines

Kommuru Goutham,<sup>a,b</sup> Veerabhushanam Kadiyala,<sup>a,b</sup> Balasubramanian Sridhar,<sup>c</sup> and Galla V. Karunakar\*<sup>a,b</sup>

<sup>†</sup>Crop Protection Chemicals Division, <sup>‡</sup>Academy of Scientific and Innovative Research, and <sup>l</sup>Center for X-ray Crystallography, CSIR-Indian Institute of Chemical Technology, Hyderabad, 500007, India.

#### Contents:

|                                                                                                                                                                                       |     |
|---------------------------------------------------------------------------------------------------------------------------------------------------------------------------------------|-----|
| 1.1 General                                                                                                                                                                           | S2  |
| 1.2 General procedure for synthesis of 2-aminophenyl prop-2-yn-1-yl enaminones ( <b>1</b> )                                                                                           | S2  |
| 1.3 General procedure for synthesis of dihydrobenzonaphthyridine derivatives ( <b>2</b> )                                                                                             | S3  |
| 1.4 Synthetic procedure for the synthesis of 1,2-Dihydro[ <i>c</i> ][2,7]naphthyridine <b>2a</b><br>(in 5 mmol scale)                                                                 | S4  |
| 1.5 Spectroscopic data of substituted (2-aminophenyl)prop-2-yn-1-yl)amino)-1,3-diphenylprop-2-en-1-ones ( <b>1</b> ) and 1,2-Dihydro[ <i>c</i> ][2,7] naphthyridines ( <b>2a-2v</b> ) | S5  |
| 1.6 Copies of <sup>1</sup> H and <sup>13</sup> C NMR spectra of few starting materials and ( <b>2a-2v</b> )                                                                           | S20 |
| 1.7 X-ray crystallography data of <b>2v</b>                                                                                                                                           | S49 |
| Electronic Supplementary Material (ESI) for Chemical Communications                                                                                                                   |     |

## 1.1 General information

All the reactions were carried out in oven dried reaction flasks under nitrogen atmosphere and also solvents and reagents were transferred by oven-dried syringes to ambient temperature. TLC was performed on Merck silica gel aluminium sheets using UV as a visualizing agent and a 0.5% aqueous potassium permanganate solution and heat as developing agents. Solvents were removed under reduced pressure. Columns were packed as slurry of silica gel in hexane and ethyl acetate solvent mixture. The elution was assisted by applying pressure with an air pump.  $^{13}\text{C}$  NMR spectra were recorded on 75, 100 and 125 MHz spectrometers.  $^1\text{H}$  NMR spectra were recorded on 300, 400 and 500 MHz spectrometers in appropriate solvents using TMS as internal standard. The following abbreviations were used to explain multiplicities: s = singlet, d = doublet, dd = double doublet, t = triplet, m = multiplet. All reactions were performed under nitrogen atmosphere with freshly distilled and dried solvents. All solvents were distilled using standard procedures. Unless otherwise noted, reagents were obtained from Aldrich, Alfa Aesar, and TCI used without further purification. 2-aminophenyl prop-2-yn-1-yl enaminones were (**1a-1v**) were prepared by following the reported procedure.<sup>1</sup>

## 1.2 General procedure for synthesis of (*E*)-3-((3-(2-aminophenyl)prop-2-yn-1-yl)amino)-1,3-diphenylprop-2-en-1-one derivatives (**1**)<sup>1</sup>

In a 100 mL round-bottomed two-neck flask equipped with magnetic stir bar and (*E*)-1,3-diphenyl-3-(prop-2-yn-1-ylamino)prop-2-en-1-one **I** (1 g, 3.8 mmol, 1equiv.), 2-iodoaniline **II** (0.83 g, 3.8 mmol, 1equiv.),  $(\text{Ph}_3\text{P})_2\text{PdCl}_2$  (78 mg, 0.11 mmol, 0.03 equiv.) and CuI (36 mg, 0.19 mmol, 0.05 equiv.) was evacuated and filled with nitrogen, then dissolved in acetonitrile solvent (40 mL). This reaction flask was then purged with nitrogen for 15 min. To this reaction mixture

added Et<sub>3</sub>N (2.66 mL, 19.1 mmol, 5 equiv.) drop wisely over 15-20 min. The reaction mixture was allowed to stir at room temperature for 12 hours. After completion of the reaction (monitored by TLC), the reaction mixture was filtered through cilite pad. The reaction mass was extracted with ethyl acetate. The combined organic layers were washed with aqueous brine, dried over anhydrous Na<sub>2</sub>SO<sub>4</sub>, and concentrated under vacuum. The crude residue was purified through a silica gel column chroma-tography using hexane and ethyl acetate as eluent (10/1.6) to give 77.4% (735 mg) yield of pure (*E*)-3-((3-(2-aminophenyl)prop-2-yn-1-yl)amino)-1,3-diphenylprop-2-en-1-one **1a**. A similar experimental procedure was adopted for the synthesis of substituted 2-aminophenyl prop-2-yn-1-yl enaminones (**1b-1v**).

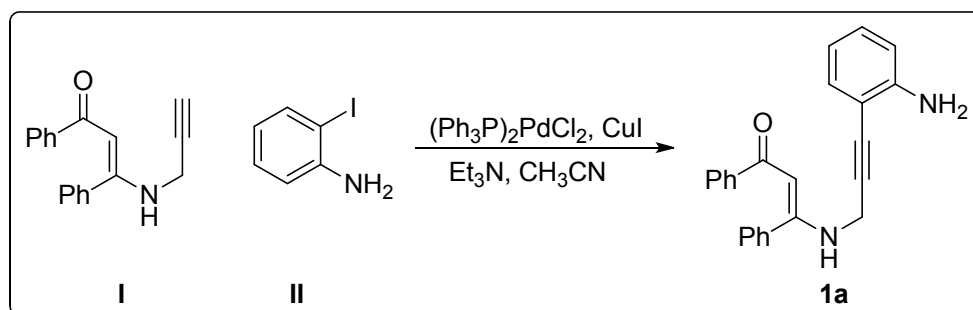

### 1.3 General procedure for synthesis of dihydrobenzonaphthyridine derivatives (2)

In a 25 mL round-bottomed two-neck flask equipped with magnetic stir bar and 3-((3-(2-aminophenyl)prop-2-yn-1-yl)amino)-1,3-diphenylprop-2-en-1-one **1a** (124 mg, 0.35 mmol, 1 equiv.) purged with dry nitrogen, then dissolved in acetic acid ( 3 mL ). To this reaction flask Ph<sub>3</sub>PAuCl (7.0 mg, 0.0142 mmol, 5 mol%) and AgSbF<sub>6</sub> (4.9 mg, 0.0142 mmol, 5 mol%) was added. The reaction mixture was allowed to stir at room temperature for 2 hours. After completion of the reaction (monitored by TLC), the reaction mixture was diluted with ethyl acetate. To this reaction mixture, saturated NaHCO<sub>3</sub> solution was added and stirred for 5 min. The reaction mass was extracted with ethyl acetate (2 x 5 mL). The combined organic layers

were washed with aqueous brine, dried over anhydrous Na<sub>2</sub>SO<sub>4</sub>, and concentrated under vacuum. The crude residue was purified through a silica gel column using hexane and ethyl acetate as eluent (10/2.7) to give 96% (118 mg) yield of pure 4,5-diphenyl-1,2-dihydrobenzo[*c*][2,7]naphthyridine **2a**. A similar experimental procedure was adopted for the synthesis of all 1,2-dihydrobenzo[*c*][2,7]naphthyridine derivatives (**2b-2v**).

#### 1.4 Synthetic procedure for synthesis of 4,5-Diphenyl-1,2-dihydrobenzo[*c*][2,7]naphthyridine (**2a**) [experiment was conducted in 5mmol scale].

To a stirring solution of 3-((3-(2-aminophenyl)prop-2-yn-1-yl)amino)-1,3-diphenylprop-2-en-1-one **1a** (1.75 g, 5 mmol, 1 equiv.) in acetic acid (20 mL) under dry condition, added Ph<sub>3</sub>PAuCl (123 mg, 0.25 mmol, 5 mol%) and AgSbF<sub>6</sub> (87 mg, 0.25 mmol, 5 mol%). The reaction mixture was allowed to stir at room temperature for 2 hours. After completion of the reaction (monitored by TLC), the reaction mixture was diluted with ethyl acetate. To this reaction mixture, saturated NaHCO<sub>3</sub> solution was added and stirred for 5 min. The reaction mass was extracted with ethyl acetate (2 x 50 mL). The combined organic layers were washed with aqueous brine, dried over anhydrous Na<sub>2</sub>SO<sub>4</sub>, and concentrated under vacuum. The crude residue was purified through a silica gel column using hexane and ethyl acetate as eluent (10/2.7) to give 94% (1.57 g) yield of pure 4,5-diphenyl-1,2-dihydrobenzo[*c*][2,7]naphthyridine **2a**.

- 
1. (a) S. Cacchi, G. Fabrizi and E. Filisti, *Org. Lett.* 2008, **10**, 2679. (b) A. Wetzel and F. Gagosz, *Angew. Chem. Int. Ed.* **2011**, *50*, 7354. (c) K. Goutham, N. S. V. M. Rao Mangina, S. Suresh, P. Raghavaiah and G. V. Karunakar, *Org. Biomo. Chem.* **2014**, *12*, 2869.

**1.5 Spectroscopic data of 2-aminophenyl prop-2-yn-1-yl enaminones (1a, 1b, 1d, 1h, 1i, 1k and 1l) and 1,2-Dihydro[c][2,7]naphthyridines (2a-2v).**

**3-((3-(2-aminophenyl)prop-2-yn-1-yl)amino)-1,3-diphenylprop-2-en-1-one (1a) :**

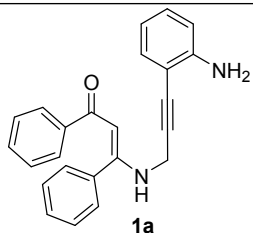

semisolid,  $R_f$  0.3 (Hexane: EtOAc, 1:0.15); 735 mg, 77.4% yield; ( $^1\text{H}$  NMR,  $\text{CDCl}_3$ , 500 MHz):  $\delta$  11.41 (1H, t,  $J = 6.2$  Hz), 7.90 (2H, d,  $J = 6.8$  Hz), 7.55-7.51 (2H, m), 7.50-7.41 (3H, m), 7.45-7.38 (3H, m), 7.23 (1H, d,  $J = 6.7$  Hz), 7.10 (1H, dt,  $J = 7.7, 1.5$  Hz), 6.66 (2H, d,  $J = 7.7$  Hz), 5.86 (1H, s), 4.22 (2H, d,  $J = 6.2$  Hz) ppm; ( $^{13}\text{C}$  NMR  $\text{CDCl}_3$ , 125 MHz):  $\delta$  189.1, 165.9, 148.0, 139.9, 135.0, 132.3, 130.9, 129.7, 128.6, 128.29, 128.21, 127.8, 127.1, 117.7, 114.2, 107.0, 94.7, 90.3, 80.8, 35.2 ppm; IR (KBr, neat):  $\nu_{\text{max}}$  3462, 3360, 3060, 2955, 2922, 2854, 2184, 1593, 1561, 1485, 1325, 1300, 1226, 1144, 1057, 1022  $\text{cm}^{-1}$ .

**3-((3-(2-aminophenyl)prop-2-yn-1-yl)amino)-1-(naphthalen-2-yl)-3-phenylprop-2-en-1-one (1b) :**

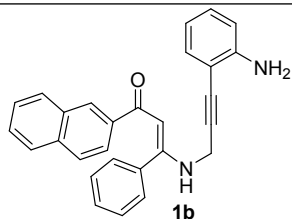

brown oil,  $R_f$  0.4 (Hexane: EtOAc, 1:0.13); 650 mg, 50.3% yield; ( $^1\text{H}$  NMR  $\text{CDCl}_3$ , 400 MHz) :  $\delta$  11.49 (1H, t,  $J = 6.2$  Hz), 8.40 (1H, s), 8.02 (1H, dd,  $J = 8.5, 1.7$  Hz), 7.91 (1H, dd,  $J = 7.3, 1.7$  Hz), 7.85 (2H, t,  $J = 8.4$  Hz), 7.59-7.55 (2H, m), 7.53-7.49 (5H, m), 7.24 (1H, d,  $J = 1.4$ ), 7.11(1H, dt,  $J = 7.8, 1.5$  Hz), 6.67 (2H, d,  $J = 7.9$  Hz), 6.02 (1H, s), 4.25 (2H, d,  $J = 6.2$  Hz) ppm; ( $^{13}\text{C}$  NMR  $\text{CDCl}_3$ , 100 MHz):  $\delta$  188.9, 165.9, 148.0, 137.2, 135.0, 134.6, 132.8, 132.3, 129.8, 129.1, 128.7, 127.9, 127.6, 127.2, 126.2, 124.0, 117.7, 114.2, 107.1, 94.9, 90.4, 80.9, 35.2 ppm; IR (KBr, neat):  $\nu_{\text{max}}$  3462, 3362, 3061, 2927, 2846, 2175, 1655, 1594, 1514, 1484, 1452,

1308, 1253, 1173, 1143, 1066  $\text{cm}^{-1}$ .

**3-((3-(2-aminophenyl)prop-2-yn-1-yl)amino)-1-(2,4-dichlorophenyl)-3-phenylprop-2-en-1-one (1d) :**

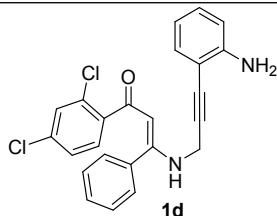

brown oil,  $R_f$  0.4 (Hexane: EtOAc, 1:0.13); 660 mg, 52.3% yield; ( $^1\text{H}$  NMR  $\text{CDCl}_3$ , 400 MHz) :  $\delta$  11.25 (1H, t,  $J = 6.2$  Hz), 7.55-7.51 (2H, m), 7.50-7.45 (4H, m), 7.40 (1H, d,  $J = 1.9$  Hz), 7.25-7.23 (2H, m), 7.12 (1H, dt,  $J = 7.7, 1.4$  Hz), 6.68 (2H, d,  $J = 7.8$  Hz), 5.52 (1H, s), 4.26 (2H, d,  $J = 6.2$  Hz), 4.16 (2H, s, br) ppm; ( $^{13}\text{C}$  NMR  $\text{CDCl}_3$ , 100 MHz):  $\delta$  188.6, 166.1, 148.0, 139.3, 135.3, 134.3, 132.3, 131.8, 130.3, 130.0, 129.94, 129.91, 128.7, 127.8, 126.9, 117.8, 114.3, 106.9, 98.3, 89.9, 81.2, 35.3 ppm; IR (KBr, neat):  $\nu_{\text{max}}$  3467, 3363, 2954, 2922, 2856, 2150, 1559, 1485, 1455, 1370, 1317, 1266, 1142, 1086, 1036  $\text{cm}^{-1}$ .

**3-((3-(2-aminophenyl)prop-2-yn-1-yl)amino)-1-(4-methoxyphenyl)-3-phenylprop-2-en-1-one (1h) :**

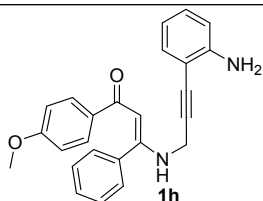

yellow oil,  $R_f$  0.2 (Hexane: EtOAc, 1:0.18); 760 mg, 64% yield; ( $^1\text{H}$  NMR  $\text{CDCl}_3$ , 500 MHz):  $\delta$  11.30 (1H, t,  $J = 6.2$  Hz), 7.89 (2H, d,  $J = 8.8$  Hz), 7.55-7.51 (2H, m), 7.48 (3H, d,  $J = 2.4$  Hz), 7.23 (1H, d,  $J = 7.0$  Hz), 7.10 (1H, dt,  $J = 7.9, 1.2$  Hz), 6.90 (2H, d,  $J = 8.6$  Hz), 6.66 (2H, d,  $J = 7.7$  Hz), 5.83 (1H, s), 4.20 (2H, d,  $J = 6.2$  Hz), 3.84 (3H, s) ppm; ( $^{13}\text{C}$  NMR  $\text{CDCl}_3$ , 100 MHz):  $\delta$  188.2, 165.3, 161.9, 148.0, 135.2, 132.6, 132.2, 129.7, 129.6, 129.0, 128.6, 127.8, 117.7, 114.2, 113.4, 107.1, 94.3, 90.5, 80.7, 55.3, 35.1 ppm; IR (KBr, neat):  $\nu_{\text{max}}$  3462, 3361, 2956, 2924, 2850, 2121, 1591, 1563, 1484, 1454, 1321, 1252, 1173, 1140, 1064  $\text{cm}^{-1}$ .

**3-((3-(2-aminophenyl)prop-2-yn-1-yl)amino)-1-(4-(tert-butyl)phenyl)-3-phenylprop-2-en-1-one (1i) :**

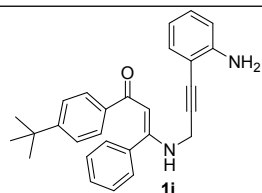

pale brown solid,  $R_f$  0.4 (Hexane: EtOAc, 1:0.14); mp 117-112 °C; 730 mg, 56.8% yield; ( $^1\text{H}$  NMR  $\text{CDCl}_3$ , 400 MHz):  $\delta$  11.37 (1H, t,  $J = 6.2$  Hz), 7.84 (2H, d,  $J = 8.4$  Hz), 7.55-7.50 (2H, m), 7.49-7.45 (3H, m), 7.42 (2H, d,  $J = 8.4$  Hz), 7.23 (1H, d,  $J = 8.0$  Hz), 7.09 (1H, dt,  $J = 7.7, 1.3$  Hz), 6.65 (2H, d,  $J = 7.9$  Hz), 5.86 (1H, s), 4.24 (2H, d,  $J = 6.2$  Hz), 1.33 (9H, s) ppm; ( $^{13}\text{C}$  NMR  $\text{CDCl}_3$ , 100 MHz):  $\delta$  189.0, 165.5, 154.3, 148.0, 137.2, 135.1, 132.2, 129.7, 128.6, 127.8, 126.9, 125.1, 117.6, 114.2, 107.0, 94.7, 90.4, 80.7, 35.1, 34.8, 31.1 ppm; IR (KBr, neat):  $\nu_{\text{max}}$  3455, 3325, 2959, 2866, 2143, 1593, 1561, 1483, 1359, 1302, 1268, 1192, 1110, 1064, 1017  $\text{cm}^{-1}$ .

**3-((3-(2-aminophenyl)prop-2-yn-1-yl)amino)-1-(4-bromophenyl)-3-(*p*-tolyl)prop-2-en-1-one (1k) :**

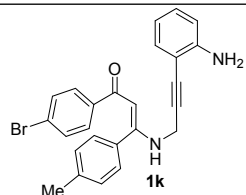

semi solid,  $R_f$  0.5 (Hexane: EtOAc, 1:0.12); 500 mg, 53% yield; ( $^1\text{H}$  NMR  $\text{CDCl}_3$ , 500 MHz) :  $\delta$  11.43 (1H, t,  $J = 6.2$  Hz), 7.75 (2H, d,  $J = 8.5$  Hz), 7.52 (2H, d,  $J = 5.5$  Hz), 7.42 (2H, d,  $J = 7.9$  Hz), 7.29 (3H, d,  $J = 7.9$  Hz), 7.23 (1H, d,  $J = 8.0$  Hz), 7.11 (1H, dt,  $J = 8.0, 1.3$  Hz), 6.67 (1H, d,  $J = 8.0$  Hz), 5.78 (1H, s), 4.24 (2H, d,  $J = 6.2$  Hz), 2.42 (3H, s) ppm; ( $^{13}\text{C}$  NMR  $\text{CDCl}_3$ , 125 MHz) :  $\delta$  187.4, 166.5, 148.0, 140.1, 138.8, 132.3, 131.8, 131.3, 129.8, 129.3, 128.7, 127.7, 125.5, 117.7, 114.2, 107.0, 94.1, 90.2, 80.9, 35.2, 21.3 ppm; IR (KBr, neat):  $\nu_{\text{max}}$  3466, 3358, 2954, 2922, 2855, 2133, 1579, 1495, 1320, 1142, 1067, 1008  $\text{cm}^{-1}$ .

**3-((3-(2-aminophenyl)prop-2-yn-1-yl)amino)-3-phenyl-1-(thiophen-2-yl)prop-2-en-1-one (1u) :**

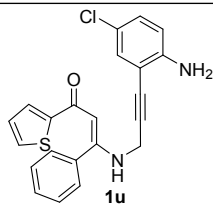

colourless solid,  $R_f$  0.4 (Hexane: EtOAc, 1:0.14); mp 95-92 °C; 550 mg, 46.8% yield; ( $^1\text{H}$  NMR  $\text{CDCl}_3$ , 400 MHz):  $\delta$  11.02 (1H, t,  $J = 6.2$  Hz), 7.57 (1H, d,  $J = 3.0$  Hz), 7.49 (6H, s), 7.17 (1H, d,  $J = 2.3$  Hz), 7.08-7.01 (2H, m), 6.58 (1H, d,  $J = 8.6$  Hz), 5.74 (1H, s), 4.18 (2H, d,  $J = 6.2$  Hz) ppm; ( $^{13}\text{C}$  NMR  $\text{CDCl}_3$ , 100 MHz):  $\delta$  182.0, 165.5, 146.6, 134.6, 131.3, 130.6, 129.8, 129.7, 128.6, 128.1, 127.7, 121.8, 115.3, 108.2, 94.5, 91.2, 79.7, 35.0 ppm; IR (KBr, neat):  $\nu_{\text{max}}$  3434, 3315, 2956, 2922, 2855, 2115, 1588, 1559, 1523, 1482, 1413, 1355, 1313, 1239, 1143, 1065, 1006  $\text{cm}^{-1}$ .

**4,5-Diphenyl-1,2-dihydrobenzo[*c*][2,7]naphthyridine (2a):**

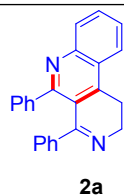

brick red solid;  $R_f$  0.3 (Hexane: EtOAc, 1:0.25); mp 97-95 °C; 118 mg, 96% yield; ( $^1\text{H}$  NMR, 400 MHz):  $\delta$  8.21 (1H, d,  $J = 8.192$  Hz), 8.11 (1H, d,  $J = 8.192$  Hz), 7.81 (1H, dt,  $J = 6.847$ , 1.345 Hz), 7.63 (1H, dt,  $J = 6.847$ , 1.345 Hz), 7.44 (2H, dd,  $J = 8.192$ , 1.589 Hz), 7.17 (2H, d,  $J = 8.192$  Hz), 7.10-7.04 (3H, m), 7.03-6.95 (3H, m), 4.03 (2H, t,  $J = 6.847$  Hz), 3.19 (2H, t,  $J = 6.847$  Hz); ( $^{13}\text{C}$  NMR, 100 MHz):  $\delta$  167.6, 157.5, 149.9, 147.5, 140.5, 139.5, 130.8, 130.0, 129.6, 128.6, 128.3, 127.8, 127.5, 126.7, 124.0, 123.6, 120.7, 46.8, 23.3 ppm; HRMS (ESI)  $m/z$  calcd for  $\text{C}_{24}\text{H}_{19}\text{N}_2^+$   $[\text{M}+\text{H}]^+$  335.1542, found 335.1544; IR (KBr, neat): 3060, 3023, 2924, 2852, 1711, 1600, 1545, 1445, 1214, 908  $\text{cm}^{-1}$ .



**5-(Naphthalen-2-yl)-4-phenyl-1,2-dihydrobenzo[c][2,7]naphthyridine (2b):**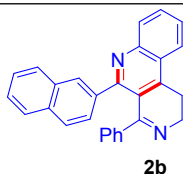

pale yellow solid;  $R_f$  0.3 (Hexane: EtOAc, 1:0.25) mp 121-123 °C; 123 mg, 91% yield; ( $^1\text{H}$  NMR, 400 MHz):  $\delta$  8.25 (1H, d,  $J = 8.314$  Hz), 8.15 (1H, d,  $J = 8.314$  Hz), 7.84 (1H, dt,  $J = 8.192, 1.223$  Hz), 7.76 (1H, s), 7.74-7.64 (4H, m), 7.60 (1H, d,  $J = 8.436$  Hz), 7.43-7.37 (2H, m), 7.14 (2H, dd,  $J = 7.825, 2.323$  Hz), 6.83-6.76 (3H, m), 4.11 (2H, t,  $J = 7.458$  Hz), 3.25 (2H, t,  $J = 7.458$  Hz) ppm; ( $^{13}\text{C}$  NMR, 125 MHz):  $\delta$  168.0, 157.5, 150.0, 147.6, 139.4, 137.7, 132.8, 132.4, 131.0, 130.0, 128.4, 128.1, 127.7, 127.3, 127.2, 126.9, 126.6, 126.2, 125.8, 124.1, 123.7, 121.0, 46.7, 23.4 ppm; HRMS (ESI)  $m/z$  calcd for  $\text{C}_{28}\text{H}_{21}\text{N}_2^+$   $[\text{M}+\text{H}]^+$  385.1699, found 385.1710; IR (KBr, neat): 3058, 3020, 2923, 2853, 1714, 1544, 1215, 1018, 906  $\text{cm}^{-1}$ .

**5-(4-Bromophenyl)-4-phenyl-1,2-dihydrobenzo[c][2,7]naphthyridine (2c):**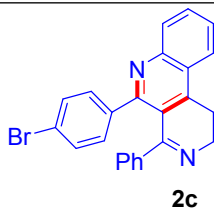

brown solid;  $R_f$  0.4 (Hexane: EtOAc, 1:0.24); mp 133-135 °C; 115 mg, 80% yield; ( $^1\text{H}$  NMR, 400 MHz):  $\delta$  8.19 (1H, d,  $J = 8.314$  Hz), 8.12 (1H, d,  $J = 8.314$  Hz), 7.83 (1H, dt,  $J = 6.847, 1.345$  Hz), 7.66 (1H, dt,  $J = 6.847, 1.345$  Hz), 7.26 (4H, q,  $J = 28.121, 8.558$  Hz), 7.15 (2H, d,  $J = 6.969$  Hz), 7.10 (1H, tt,  $J = 8.558, 1.345$  Hz), 7.04 (2H, d,  $J = 6.969$  Hz), 4.03 (2H, t,  $J = 7.458$  Hz), 3.21 (2H, t,  $J = 7.458$  Hz) ppm; ( $^{13}\text{C}$  NMR, 100 MHz):  $\delta$  167.2, 156.2, 150.1, 147.4, 139.4, 139.3, 131.1, 131.0, 130.8, 128.9, 127.7, 127.5, 127.0, 124.1, 123.7, 122.7, 120.5, 46.7, 23.2 ppm; HRMS (ESI)  $m/z$  calcd for  $\text{C}_{24}\text{H}_{18}\text{BrN}_2^+$   $[\text{M}+\text{H}]^+$  413.0647, found 413.0655; IR (KBr, neat): 3062, 3020, 2924, 2852, 1711, 1589, 1544, 1488, 1214, 1069, 1010  $\text{cm}^{-1}$ .

#### 5-(2,4-Dichlorophenyl)-4-phenyl-1,2-dihydrobenzo[c][2,7]naphthyridine (2d):

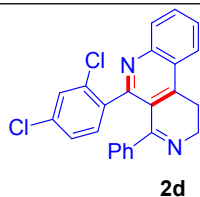

brown solid;  $R_f$  0.4 (Hexane: EtOAc, 1:0.25); mp 158-160 °C; 129 mg, 92% yield; ( $^1\text{H}$  NMR, 400 MHz):  $\delta$  8.18 (2H, t,  $J = 7.336$  Hz), 7.84 (1H, dt,  $J = 6.969, 1.223$  Hz), 7.71 (1H, dt,  $J = 6.969, 1.223$  Hz), 7.23 (1H, dd,  $J = 7.58, 1.46$  Hz), 7.16 (2H, d,  $J = 7.58$  Hz), 7.13 (1H, dd,  $J = 8.069, 1.46$  Hz), 7.08-7.02 (3H, m), 6.97 (1H, t,  $J = 8.069$  Hz), 4.23 (1H, dt,  $J = 14.427, 5.50$  Hz), 3.74 (1H, dt,  $J = 13.449, 4.768$  Hz), 3.36 (1H, td,  $J = 10.759, 5.50$  Hz), 3.11 (1H, dt,  $J = 13.449, 5.38$  Hz) ppm; ( $^{13}\text{C}$  NMR, 100 MHz):  $\delta$  167.2, 154.3, 148.5, 147.5, 141.4, 139.3, 132.8, 131.1, 130.0, 129.9, 128.8, 127.5, 127.1, 126.9, 124.6, 123.8, 122.2, 46.5, 22.7 ppm; HRMS (ESI)  $m/z$  calcd for  $\text{C}_{24}\text{H}_{17}\text{Cl}_2\text{N}_2^+$   $[\text{M}+\text{H}]^+$  403.0763, found 403.0766; IR (KBr, neat): 2955, 2925, 2852, 1714, 1603, 1551, 1410, 1215, 1080, 1025  $\text{cm}^{-1}$ .

#### 4-(4-Phenyl-1,2-dihydrobenzo[c][2,7]naphthyridin-5-yl)benzonitrile (2e):

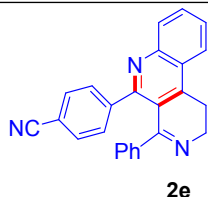

colorless solid;  $R_f$  0.3 (Hexane: EtOAc, 1:0.26); mp 135-137 °C; 106 mg, 84% yield; ( $^1\text{H}$  NMR, 500 MHz):  $\delta$  8.20 (1H, d,  $J = 8.392$  Hz), 8.15 (1H, d,  $J = 8.392$  Hz), 7.86 (1H, dt,  $J = 8.24, 1.22$  Hz), 7.70 (1H, dt,  $J = 8.24, 1.22$  Hz), 7.54 (2H, d,  $J = 8.392$  Hz), 7.39 (2H, d,  $J = 8.392$  Hz), 7.15 (2H, d,  $J = 7.324$  Hz), 7.08 (1H, tt,  $J = 7.324, 1.22$  Hz), 7.01 (2H, t,  $J = 7.324$  Hz), 4.05 (2H, t,  $J = 7.629$  Hz), 3.23 (2H, t,  $J = 7.629$  Hz) ppm; ( $^{13}\text{C}$  NMR, 125 MHz):  $\delta$  166.6, 155.2, 150.4, 147.3, 144.8, 139.2, 131.4, 131.3, 130.2, 130.1, 129.2, 127.8, 127.5, 124.3, 123.7, 120.5, 118.5, 111.5, 46.7, 23.1 ppm; HRMS (ESI)  $m/z$  calcd for  $\text{C}_{25}\text{H}_{18}\text{N}_3^+$   $[\text{M}+\text{H}]^+$  360.1495, found 360.1508; IR (KBr, neat): 3020, 2925, 2852, 2227, 1601, 1492, 1447, 1214, 907  $\text{cm}^{-1}$ .

#### 4-Phenyl-5-(4-(trifluoromethyl)phenyl)-1,2-dihydrobenzo[c][2,7]naphthyridine (2f):

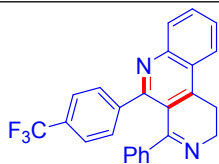

2f

brown solid;  $R_f$  0.3 (Hexane: EtOAc, 1:0.26); mp 125-127 °C; 112 mg, 80% yield; ( $^1\text{H}$  NMR, 500MHz):  $\delta$  8.20 (1H, d,  $J = 8.392$  Hz), 8.11 (1H, d,  $J = 8.392$  Hz), 7.82 (1H, dt,  $J = 7.01, 1.06$  Hz), 7.65 (1H, dt,  $J = 7.01, 1.06$  Hz), 7.51 (2H, d,  $J = 8.087$  Hz), 7.33 (2H, d,  $J = 8.087$  Hz), 7.12 (2H, d,  $J = 7.324$  Hz), 7.02 (1H, t,  $J = 7.324$  Hz), 6.97 (2H, t,  $J = 7.782$  Hz), 4.02 (2H, t,  $J = 7.172$  Hz), 3.19 (2H, t,  $J = 7.172$  Hz) ppm; ( $^{13}\text{C}$  NMR, 125 MHz):  $\delta$  167.0, 155.9, 150.1, 147.4, 143.9, 139.3, 131.1, 130.0, 129.9, 128.9, 127.6, 127.5, 127.2, 124.5, 124.2, 123.7, 120.7, 46.6, 23.1 ppm; HRMS (ESI)  $m/z$  calcd for  $\text{C}_{25}\text{H}_{18}\text{F}_3\text{N}_2^+$   $[\text{M}+\text{H}]^+$  403.1416, found 403.1421; IR (KBr, neat): 3061, 2954, 2927, 2857, 1601, 1549, 1411, 1164, 1123, 1108, 1065, 1017  $\text{cm}^{-1}$ .

#### 5-(4-Fluorophenyl)-4-phenyl-1,2-dihydrobenzo[c][2,7]naphthyridine (2g):

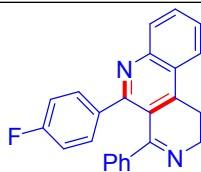

2g

colorless solid;  $R_f$  0.4 (Hexane: EtOAc, 1:0.25); mp 139-141 °C; 115 mg, 93% yield; ( $^1\text{H}$  NMR, 300 MHz):  $\delta$  8.20 (1H, d,  $J = 8.309$  Hz), 8.11 (1H, d,  $J = 8.309$  Hz), 7.84 (1H, t,  $J = 8.12$  Hz), 7.66 (1H, t,  $J = 8.12$  Hz), 7.43 (2H, q,  $J = 8.498, 5.476$  Hz), 7.18 (2H, d,  $J = 6.987$  Hz), 7.13-6.99 (3H, m), 6.80 (2H, t,  $J = 8.498$  Hz), 4.05 (2H, t,  $J = 7.176$  Hz), 3.23 (2H, t,  $J = 7.176$  Hz) ppm; ( $^{13}\text{C}$  NMR, 125 MHz):  $\delta$  167.7, 163.6, 161.7, 156.4, 150.2, 147.5, 139.1, 136.6, 131.45 (2C, d,  $J = 9.082$  Hz), 131.1, 129.9, 129.0, 127.6 (2C, d,  $J = 14.532$  Hz), 126.9, 124.0, 123.7, 120.6, 114.75 (1C, d,  $J = 21.798$  Hz), 46.5, 23.3 ppm; HRMS (ESI)  $m/z$  calcd for  $\text{C}_{24}\text{H}_{16}\text{FN}_2^+$   $[\text{M}-\text{H}]^+$  351.1292, found 351.1302; IR (KBr, neat) : 3020, 2924, 2853, 1711, 1601, 1494, 1215, 1156, 906  $\text{cm}^{-1}$ .

**5-(4-Methoxyphenyl)-4-phenyl-1,2-dihydrobenzo[c][2,7]naphthyridine (2h):**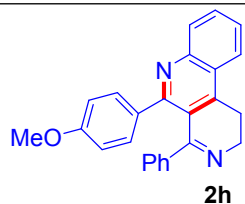

orange solid;  $R_f$  0.1 (Hexane: EtOAc, 1:0.28); mp 148-150°C; 108 mg, 85% yield; ( $^1\text{H}$  NMR, 400 MHz):  $\delta$  8.19 (1H, d,  $J = 8.314$  Hz), 8.10 (1H, d,  $J = 8.314$  Hz), 7.81 (1H, dt,  $J = 6.847, 1.22$  Hz), 7.62 (1H, dt,  $J = 6.847, 1.22$  Hz), 7.39 (2H, d,  $J = 8.803$  Hz), 7.18 (2H, dd,  $J = 7.947, 1.22$  Hz), 7.08-6.98 (3H, m), 6.64 (2H, d,  $J = 8.925$  Hz), 4.03 (2H, t,  $J = 7.580$  Hz), 3.70 (3H, s), 3.20 (2H, t,  $J = 7.580$  Hz) ppm; ( $^{13}\text{C}$  NMR, 100 MHz):  $\delta$  168.0, 159.7, 157.1, 150.0, 147.5, 139.2, 133.2, 131.0, 130.9, 129.8, 128.8, 127.5, 126.5, 123.9, 123.6, 120.6, 113.3, 55.2, 46.6, 23.4 ppm; HRMS (ESI)  $m/z$  calcd for  $\text{C}_{25}\text{H}_{21}\text{N}_2\text{O}^+$   $[\text{M}+\text{H}]^+$  365.1648, found 365.1647; IR (KBr, neat): 3061, 3019, 2924, 2853, 1714, 1606, 1511, 1458, 1338, 1248, 1215, 1174, 1030  $\text{cm}^{-1}$ .

**5-(4-(tert-butyl)phenyl)-4-phenyl-1,2-dihydrobenzo[c][2,7]naphthyridine (2i):**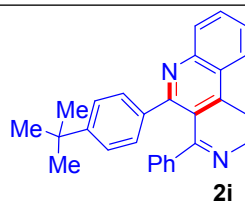

cream color solid;  $R_f$  0.3 (Hexane: EtOAc, 1:0.23); mp 157-159 °C; 95 mg, 70% yield; ( $^1\text{H}$  NMR, 300 MHz):  $\delta$  8.21 (1H, d,  $J = 8.49$  Hz), 8.13 (1H, d,  $J = 8.49$  Hz), 7.82 (1H, t,  $J = 8.12$  Hz), 7.64 (1H, t,  $J = 8.12$  Hz), 7.30 (2H, d,  $J = 8.309$  Hz), 7.17-7.05 (5H, m), 6.97 (2H, t,  $J = 5.85$  Hz), 4.05 (2H, t,  $J = 7.176$  Hz), 3.23 (2H, t,  $J = 7.176$  Hz), 1.18 (9H, s) ppm; ( $^{13}\text{C}$  NMR, 125 MHz):  $\delta$  168.4, 157.8, 151.2, 149.9, 147.6, 138.9, 137.4, 131.0, 129.9, 129.4, 128.6, 127.7, 127.4, 126.7, 124.6, 123.7, 120.8, 46.1, 34.3, 30.9, 23.3 ppm; HRMS (ESI)  $m/z$  calcd for  $\text{C}_{28}\text{H}_{27}\text{N}_2^+$   $[\text{M}+\text{H}]^+$  391.2168, found 391.2167; IR (KBr, neat): 3019, 2961, 2923, 2853, 1714, 1605, 1544, 1214, 1018, 907  $\text{cm}^{-1}$ .

**5-(4-Ethylphenyl)-4-(p-tolyl)-1,2-dihydrobenzo[c][2,7]naphthyridine (2j):**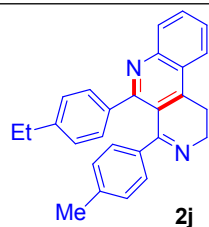

brick red solid;  $R_f$  0.4 (Hexane: EtOAc, 1:0.23); mp 143-145 °C; 86 mg, 65% yield; ( $^1\text{H}$  NMR, 500 MHz):  $\delta$  8.20 (1H, d,  $J = 8.392$  Hz), 8.07 (1H, d,  $J = 8.392$  Hz), 7.78 (1H, dt,  $J = 8.24, 1.37$  Hz), 7.59 (1H, dt,  $J = 8.24, 1.37$  Hz), 7.31 (2H, d,  $J = 8.24$  Hz), 7.03 (2H, d,  $J = 8.24$  Hz), 6.90 (2H, d,  $J = 8.24$  Hz), 6.76 (2H, d,  $J = 8.24$  Hz), 4.00 (2H, t,  $J = 7.477$  Hz), 3.17 (2H, t,  $J = 7.477$  Hz), 2.47 (2H, q,  $J = 15.259, 7.629$  Hz), 1.06 (3H, t,  $J = 7.629$  Hz), 2.12 (3H, s) ppm; ( $^{13}\text{C}$  NMR, 125 MHz):  $\delta$  167.8, 157.7, 149.8, 147.4, 144.5, 138.3, 137.8, 136.4, 130.7, 129.8, 129.6, 128.0, 127.5, 127.2, 126.5, 123.9, 123.6, 120.8, 46.3, 28.5, 23.3, 20.9, 15.7 ppm; HRMS (ESI)  $m/z$  calcd for  $\text{C}_{27}\text{H}_{25}\text{N}_2^+ [\text{M}+\text{H}]^+$  377.2012, found 377.2011; IR (KBr, neat): 3020, 2961, 2925, 2853, 1712, 1600, 1547, 1214, 1019, 908  $\text{cm}^{-1}$ .

**5-(4-Bromophenyl)-4-(p-tolyl)-1,2-dihydrobenzo[c][2,7]naphthyridine (2k):**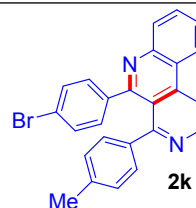

brown solid;  $R_f$  0.3 (Hexane: EtOAc, 1:0.24); mp 110-112 °C; 121 mg, 81% yield; ( $^1\text{H}$  NMR, 500 MHz):  $\delta$  8.19 (1H, d,  $J = 8.392$  Hz), 8.12 (1H, d,  $J = 8.392$  Hz), 7.83 (1H, dt,  $J = 7.09, 1.22$  Hz), 7.65 (1H, dt,  $J = 7.09, 1.22$  Hz), 7.31 (2H, d,  $J = 8.54$  Hz), 7.24 (2H, d,  $J = 8.54$  Hz), 7.04 (2H, d,  $J = 7.934$  Hz), 6.83 (2H, d,  $J = 7.934$  Hz), 4.01 (2H, t,  $J = 7.019$  Hz), 3.20 (2H, t,  $J = 7.019$  Hz), 2.20 (3H, s) ppm; ( $^{13}\text{C}$  NMR, 125 MHz):  $\delta$  167.4, 156.3, 150.3, 147.5, 139.4, 139.2, 136.1, 137.47, 137.40, 131.18, 131.13, 130.8, 130.0, 128.4, 127.6, 127.0, 124.1, 123.7, 122.7, 120.6, 46.3, 23.3, 21.1 ppm; HRMS (ESI)  $m/z$  calcd for  $\text{C}_{25}\text{H}_{20}\text{BrN}_2^+ [\text{M}+\text{H}]^+$  427.0804, found 427.0796; IR (KBr, neat): 3020, 2923, 2853, 1586, 1215, 1069, 1010, 906  $\text{cm}^{-1}$ .

#### 4-Phenyl-5-(thiophen-2-yl)-1,2-dihydrobenzo[*c*][2,7]naphthyridine (2l):

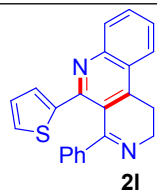

colorless solid;  $R_f$  0.3 (Hexane: EtOAc, 1:0.26); mp 137-139 °C; 103 mg, 86% yield; ( $^1\text{H}$  NMR, 400 MHz):  $\delta$  8.15 (1H, d,  $J = 8.314$  Hz), 8.07 (1H, d,  $J = 8.314$  Hz), 7.80 (1H, dt,  $J = 6.969, 1.345$  Hz), 7.60 (1H, dt,  $J = 6.969, 1.345$  Hz), 7.32 (2H, dd,  $J = 7.580, 1.223$  Hz), 7.17 (1H, dd,  $J = 5.135, 1.223$  Hz), 7.15-7.06 (3H, m), 6.84 (1H, dd,  $J = 3.668, 0.978$  Hz), 6.66 (1H, dd,  $J = 5.013, 3.668$  Hz), 4.02 (2H, t,  $J = 7.336$  Hz), 3.18 (2H,  $J = 7.336$  Hz) ppm; ( $^{13}\text{C}$  NMR, 100 MHz):  $\delta$  166.9, 150.7, 150.2, 147.5, 143.1, 139.3, 130.9, 129.7, 128.8, 127.9, 127.7, 127.1, 126.6, 124.0, 123.6, 120.0, 46.7, 23.4 ppm; HRMS (ESI)  $m/z$  calcd for  $\text{C}_{22}\text{H}_{17}\text{N}_2\text{S}^+$   $[\text{M}+\text{H}]^+$  341.1107, found 341.1104; IR (KBr, neat): 3062, 3020, 2955, 2851, 1598, 1548, 1492, 1428, 1214, 1015  $\text{cm}^{-1}$ .

#### 4-Pentyl-5-phenyl-1,2-dihydrobenzo[*c*][2,7]naphthyridine (2m):

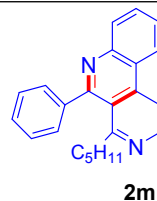

brown oil,  $R_f$  0.3; (Hexane: EtOAc, 1:0.22); 76 mg, 66% yield; ( $^1\text{H}$  NMR, 300 MHz):  $\delta$  8.18 (1H, d,  $J = 8.498$  Hz), 8.04 (1H, d,  $J = 8.498$  Hz), 7.77 (1H, t,  $J = 7.365$  Hz), 7.65 (2H, dd,  $J = 7.176, 3.77$  Hz), 7.59 (1H, t,  $J = 7.365$  Hz), 7.49 (3H, d,  $J = 3.77$  Hz), 3.80 (2H, t,  $J = 6.987$  Hz), 3.06 (2H,  $J = 6.987$  Hz), 2.11 (2H, t,  $J = 7.554$  Hz), 1.22-1.09 (2H, m), 1.08-0.95 (2H, m), 0.93-0.81 (2H, m), 0.69 (3H, t,  $J = 6.987$  Hz) ppm; ( $^{13}\text{C}$  NMR, 100 MHz):  $\delta$  170.6, 156.9, 148.6, 147.0, 141.0, 130.7, 129.8, 129.1, 128.5, 126.7, 124.0, 123.6, 121.9, 45.1, 37.6, 31.0, 27.3, 23.2, 21.9, 13.7 ppm; HRMS (ESI)  $m/z$  calcd for  $\text{C}_{23}\text{H}_{25}\text{N}_2^+$   $[\text{M}+\text{H}]^+$  329.2012, found 329.2011; IR (KBr, neat): 3023, 2984, 1713, 1373, 1240, 1044, 910  $\text{cm}^{-1}$ .

**5-Cyclohexyl-4-phenyl-1,2-dihydrobenzo[c][2,7]naphthyridine (2n):**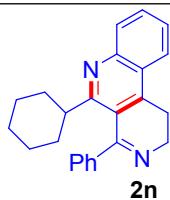

brown solid;  $R_f$  0.4 (Hexane: EtOAc, 1:0.22); mp 132-134 °C; 64 mg, 54% yield; ( $^1\text{H}$  NMR, 400 MHz):  $\delta$  8.07 (1H, dd,  $J = 8.436, 0.856$  Hz), 8.03 (1H, dd,  $J = 8.436, 0.856$  Hz), 7.74 (1H, dt,  $J = 6.847, 1.345$  Hz), 7.55 (1H, dt,  $J = 6.847, 1.345$  Hz), 7.50-7.36 (5H, m), 3.84 (2H, t,  $J = 7.214$  Hz), 3.09 (2H, t,  $J = 7.214$  Hz), 2.52-2.41 (1H, m), 1.67-1.47 (7H, m), 1.20-1.08 (1H, m), 0.83-0.71 (2H, m) ppm; ( $^{13}\text{C}$  NMR, 125 MHz):  $\delta$  167.6, 163.6, 148.2, 147.7, 141.2, 134.0, 133.9, 130.1, 129.4, 129.2, 128.3, 126.8, 125.9, 123.6, 123.5, 121.1, 46.4, 44.2, 32.2, 26.3, 25.6, 23.3 ppm; HRMS (ESI)  $m/z$  calcd for  $\text{C}_{24}\text{H}_{25}\text{N}_2^+$   $[\text{M}+\text{H}]^+$  341.2012, found 341.2008; IR (KBr, neat): 3023, 2984, 2940, 1735, 1446, 1372, 1235, 1097, 1044  $\text{cm}^{-1}$ .

**9-Methyl-4,5-diphenyl-1,2-dihydrobenzo[c][2,7]naphthyridine (2o):**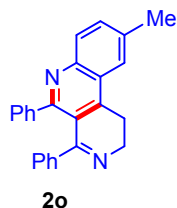

brown solid;  $R_f$  0.3 (Hexane: EtOAc, 1:0.24); mp 128-130 °C; 84 mg, 68% yield; ( $^1\text{H}$  NMR, 500 MHz):  $\delta$  8.11 (1H, d,  $J = 8.545$  Hz), 7.87 (1H, s), 7.65 (1H, dd,  $J = 8.545, 1.678$  Hz), 7.42 (2H, dd,  $J = 8.545, 1.678$  Hz), 7.16 (2H, dd,  $J = 6.866, 1.678$  Hz), 7.12-7.034 (3H, m), 7.03-6.96 (3H, m), 4.03 (2H, t,  $J = 7.477$  Hz), 3.18 (2H, t,  $J = 7.477$  Hz), 2.61 (3H, s) ppm; ( $^{13}\text{C}$  NMR, 100 MHz):  $\delta$  167.7, 156.7, 149.1, 146.0, 140.5, 139.5, 136.6, 133.0, 129.6, 129.5, 128.5, 128.0, 127.7, 127.5, 127.4, 126.8, 123.9, 122.5, 120.7, 46.7, 23.2, 21.8 ppm; HRMS (ESI)  $m/z$  calcd for  $\text{C}_{25}\text{H}_{21}\text{N}_2^+$   $[\text{M}+\text{H}]^+$  349.1699, found 349.1696; IR (KBr, neat): 3058, 3024, 2953, 2924, 2852, 1711, 1599, 1550, 1494, 1445, 1355, 1215, 1093, 1023  $\text{cm}^{-1}$ .

**9-Methyl-5-(naphthalen-2-yl)-4-phenyl-1,2-dihydrobenzo[c][2,7]naphthyridine (2p):**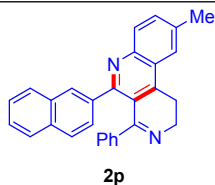

pale brown solid;  $R_f$  0.3 (Hexane: EtOAc, 1:0.24); mp 138-140 °C; 94 mg, 67% yield; ( $^1\text{H}$  NMR, 400 MHz):  $\delta$  8.14 (1H, d,  $J = 8.681$  Hz), 7.90 (1H, s), 7.74 (1H, s), 7.73-7.62 (4H, m), 7.58 (1H, d,  $J = 8.558$  Hz), 7.42-7.37 (2H, m), 7.17-7.11 (2H, m), 6.83-6.76 (3H, m), 4.09 (2H, t,  $J = 7.214$  Hz), 3.23 (2H, t,  $J = 7.214$  Hz), 2.63 (3H, s) ppm; ( $^{13}\text{C}$  NMR, 100 MHz):  $\delta$  168.0, 156.6, 149.2, 146.2, 139.7, 137.9, 136.8, 133.2, 132.7, 132.4, 129.9, 129.7, 128.3, 128.1, 127.6, 127.3, 127.1, 126.6, 126.1, 125.7, 124.0, 122.6, 121.0, 46.9, 23.3, 21.9 ppm; HRMS (ESI)  $m/z$  calcd for  $\text{C}_{29}\text{H}_{21}\text{N}_2^+$   $[\text{M}-\text{H}]^+$  397.1699, found 397.1706; IR (KBr, neat): 3057, 3020, 2924, 2852, 1596, 1484, 1314, 1215, 1125, 906  $\text{cm}^{-1}$ .

**5-(4-Bromophenyl)-9-methyl-4-phenyl-1,2-dihydrobenzo[c][2,7]naphthyridine (2q):**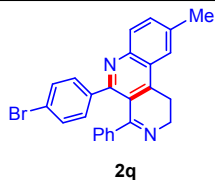

brown solid,  $R_f$  0.3 (Hexane: EtOAc, 1:0.25); mp 143-145 °C; 124 mg, 84% yield; ( $^1\text{H}$  NMR, 500 MHz):  $\delta$  8.08 (1H, d,  $J = 8.545$  Hz), 7.87 (1H, s), 7.66 (1H, dd,  $J = 8.545, 1.526$  Hz), 7.28 (2H, d,  $J = 8.392$  Hz), 7.21 (2H, d,  $J = 8.392$  Hz), 7.14 (2H, d,  $J = 7.172$  Hz), 7.09 (1H, t,  $J = 7.629$  Hz), 7.02 (2H, t,  $J = 7.629$  Hz), 4.01 (2H, t,  $J = 6.866$  Hz), 3.18 (2H, t,  $J = 6.866$  Hz), 2.62 (3H, s) ppm; ( $^{13}\text{C}$  NMR, 125 MHz):  $\delta$  167.5, 155.4, 149.4, 146.1, 139.5, 139.4, 137.1, 133.4, 131.1, 130.8, 129.7, 128.9, 127.7, 127.5, 124.1, 122.6, 120.6, 46.7, 23.2, 21.9 ppm; HRMS (ESI)  $m/z$  calcd for  $\text{C}_{25}\text{H}_{18}\text{BrN}_2^+$   $[\text{M}-\text{H}]^+$  425.0647, found 425.0659; IR (KBr, neat): 3019, 2924, 2853, 1670, 1545, 1372, 1295, 1214, 1095, 910  $\text{cm}^{-1}$ .



**5-(4-Methoxyphenyl)-9-methyl-4-phenyl-1,2-dihydrobenzo[c][2,7]naphthyridine (2r):**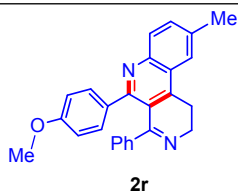

brown solid;  $R_f$  0.2 (Hexane: EtOAc, 1:0.29); mp 141-143 °C; 105 mg, 79% yield; ( $^1\text{H}$  NMR, 400 MHz):  $\delta$  8.08 (1H, d,  $J = 8.558$  Hz), 7.85 (1H, s), 7.64 (1H, dd,  $J = 8.558, 1.712$  Hz), 7.37 (2H, d,  $J = 8.925$  Hz), 7.18 (2H, dd,  $J = 7.825, 1.100$  Hz), 7.07-6.97 (3H, m), 6.63 (2H, d,  $J = 8.925$  Hz), 4.02 (2H, t,  $J = 7.214$  Hz), 3.69 (3H, s), 3.17 (2H, t,  $J = 7.214$  Hz), 2.61 (3H, s) ppm; ( $^{13}\text{C}$  NMR, 100 MHz):  $\delta$  168.0, 159.6, 156.3, 149.2, 146.2, 139.5, 136.4, 133.4, 133.1, 131.0, 129.6, 128.7, 127.5, 123.8, 122.6, 120.6, 113.3, 55.2, 46.8, 23.3, 21.9 ppm; HRMS (ESI)  $m/z$  calcd for  $\text{C}_{26}\text{H}_{21}\text{N}_2\text{O}^+$   $[\text{M}-\text{H}]^+$  377.1648, found 377.1659; IR (KBr, neat): 3019, 2926, 2839, 1598, 1510, 1302, 1251, 1214, 1173, 1029  $\text{cm}^{-1}$ .

**9-Chloro-4,5-diphenyl-1,2-dihydrobenzo[c][2,7]naphthyridine (2s):**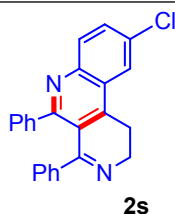

brown solid;  $R_f$  0.3 (Hexane: EtOAc, 1:0.26); mp 130-132 °C; 106 mg; 82% yield; ( $^1\text{H}$  NMR, 400 MHz):  $\delta$  8.21 (1H, d,  $J = 2.078$  Hz), 8.05 (1H, d,  $J = 8.925$  Hz), 7.59 (1H, dd,  $J = 8.925, 2.078$  Hz), 7.42 (2H, dd,  $J = 7.947, 1.834$  Hz), 7.26 (1H, d,  $J = 40.103$  Hz), 7.16 (2H, dd,  $J = 6.725, 1.589$  Hz), 7.11 (2H, d,  $J = 7.458$  Hz), 7.06-6.96 (3H, m), 4.05 (2H, t,  $J = 8.069$  Hz), 3.19 (2H, t,  $J = 8.069$  Hz) ppm; ( $^{13}\text{C}$  NMR, 125 MHz):  $\delta$  167.6, 158.6, 150.0, 147.9, 140.1, 139.1, 137.0, 129.6, 128.9, 128.8, 128.6, 127.89, 127.80, 127.59, 127.55, 125.0, 122.5, 120.8, 46.5, 23.3 ppm; HRMS (ESI)  $m/z$  calcd for  $\text{C}_{24}\text{H}_{18}\text{ClN}_2^+$   $[\text{M}+\text{H}]^+$  369.1153, found 369.1152; IR (KBr, neat): 3059, 2924, 2852, 1574, 1483, 1413, 1353, 1295, 1095, 910  $\text{cm}^{-1}$ .

**8-Chloro-9-methyl-4,5-diphenyl-1,2-dihydrobenzo[c][2,7]naphthyridine (2t):**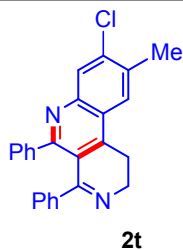

brown solid;  $R_f$  0.3 (Hexane: EtOAc, 1:0.25); mp 160-163 °C; 104 mg, 78% yield; ( $^1\text{H}$  NMR, 300 MHz):  $\delta$  8.23 (1H, s), 7.94 (1H, s), 7.41 (2H, dd,  $J = 7.703, 2.201$  Hz), 7.18-7.05 (5H, m), 7.01 (3H, t,  $J = 8.803$  Hz), 4.02 (2H, t,  $J = 7.152$  Hz), 3.16 (2H, t,  $J = 7.152$  Hz), 2.63 (3H, s) ppm; ( $^{13}\text{C}$  NMR, 100 MHz):  $\delta$  167.6, 157.8, 149.3, 146.6, 140.2, 139.3, 138.4, 135.4, 129.5, 129.2, 128.8, 128.7, 128.4, 127.8, 127.5, 126.88, 126.81, 124.5, 122.8, 120.88, 46.6, 23.3, 20.7 ppm; HRMS (ESI)  $m/z$  calcd for  $\text{C}_{25}\text{H}_{20}\text{ClN}_2^+$   $[\text{M}+\text{H}]^+$  383.1309, found 383.1310; IR (KBr, neat): 3059, 3021, 2924, 2853, 1599, 1549, 1474, 1446, 1215, 906  $\text{cm}^{-1}$ .

**9-Chloro-4-phenyl-5-(thiophen-2-yl)-1,2-dihydrobenzo[c][2,7]naphthyridine (2u):**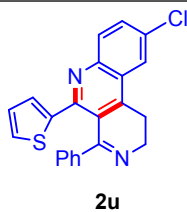

colorless solid;  $R_f$  0.3 (Hexane: EtOAc, 1:0.27); mp 159-161 °C; 100 mg, 76% yield; ( $^1\text{H}$  NMR, 400 MHz):  $\delta$  8.09 (1H, d,  $J = 9.048$  Hz), 8.04 (1H, d,  $J = 9.048$  Hz), 7.74 (1H, dd,  $J = 8.925, 2.078$  Hz), 7.48 (1H, dt,  $J = 4.646, 0.73$  Hz), 7.31 (2H, d,  $J = 8.925$  Hz), 7.18 (1H, dd,  $J = 4.646, 0.734$  Hz), 7.15-7.08 (2H, m), 6.84 (1H, dd,  $J = 3.668, 0.734$  Hz), 6.67 (1H, dd,  $J = 4.891, 3.668$  Hz), 4.03 (2H, t,  $J = 6.969$  Hz), 3.13 (2H, t,  $J = 6.969$  Hz) ppm; ( $^{13}\text{C}$  NMR, 75 MHz):  $\delta$  166.8, 151.0, 149.5, 145.9, 142.7, 138.9, 132.6, 131.8, 131.2, 129.0, 128.3, 127.8, 127.2, 127.1, 124.8, 122.7, 120.6, 46.6, 23.4 ppm; HRMS (ESI)  $m/z$  calcd for  $\text{C}_{22}\text{H}_{16}\text{ClN}_2\text{S}^+$   $[\text{M}+\text{H}]^+$  375.0717, found 375.0716; IR (KBr, neat): 3019, 1214, 1711, 1672, 1601, 1320, 1260, 843  $\text{cm}^{-1}$ .

**8-Chloro-9-methyl-4-phenyl-5-(thiophen-2-yl)-1,2-dihydrobenzo[c][2,7]naphthyridine (2v):**

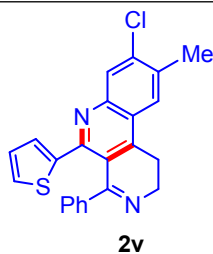

colorless solid,  $R_f$  0.4 (Hexane: EtOAc, 1:0.27); mp 185-187 °C; 109 mg, 80% yield; ( $^1\text{H}$  NMR, 500 MHz):  $\delta$  8.17 (1H, s), 7.88 (1H, s), 7.30 (2H, d,  $J = 6.866$  Hz), 7.16 (1H, dd,  $J = 5.035, 0.763$  Hz), 7.14-7.07 (3H, m), 6.81 (1H, dd,  $J = 3.662, 0.916$  Hz), 6.65 (1H, dd,  $J = 5.035, 3.662$  Hz), 4.00 (2H, t,  $J = 7.324$  Hz), 3.12 (2H, t,  $J = 7.324$  Hz), 2.60 (3H, s) ppm; ( $^{13}\text{C}$  NMR, 100 MHz):  $\delta$  167.0, 151.0, 149.6, 146.7, 142.8, 139.1, 138.6, 135.3, 131.1, 129.0, 128.9, 128.1, 127.8, 127.1, 124.5, 122.7, 120.1, 46.6, 23.5, 20.7 ppm; HRMS (ESI)  $m/z$   $[\text{M}+\text{H}]^+$  calcd for  $\text{C}_{23}\text{H}_{18}\text{ClN}_2\text{S}^+$   $[\text{M}+\text{H}]^+$  389.0873, found 389.0874; IR (KBr, neat): 3020, 2924, 2852, 1598, 1574, 1546, 1475, 1433, 1214  $\text{cm}^{-1}$ .

## 1.6 Copies of $^1\text{H}$ and $^{13}\text{C}$ NMR spectra (**1a**, **1b**, **1d**, **1h**, **1i**, **1k**, **1u**) (**2a-2v**)

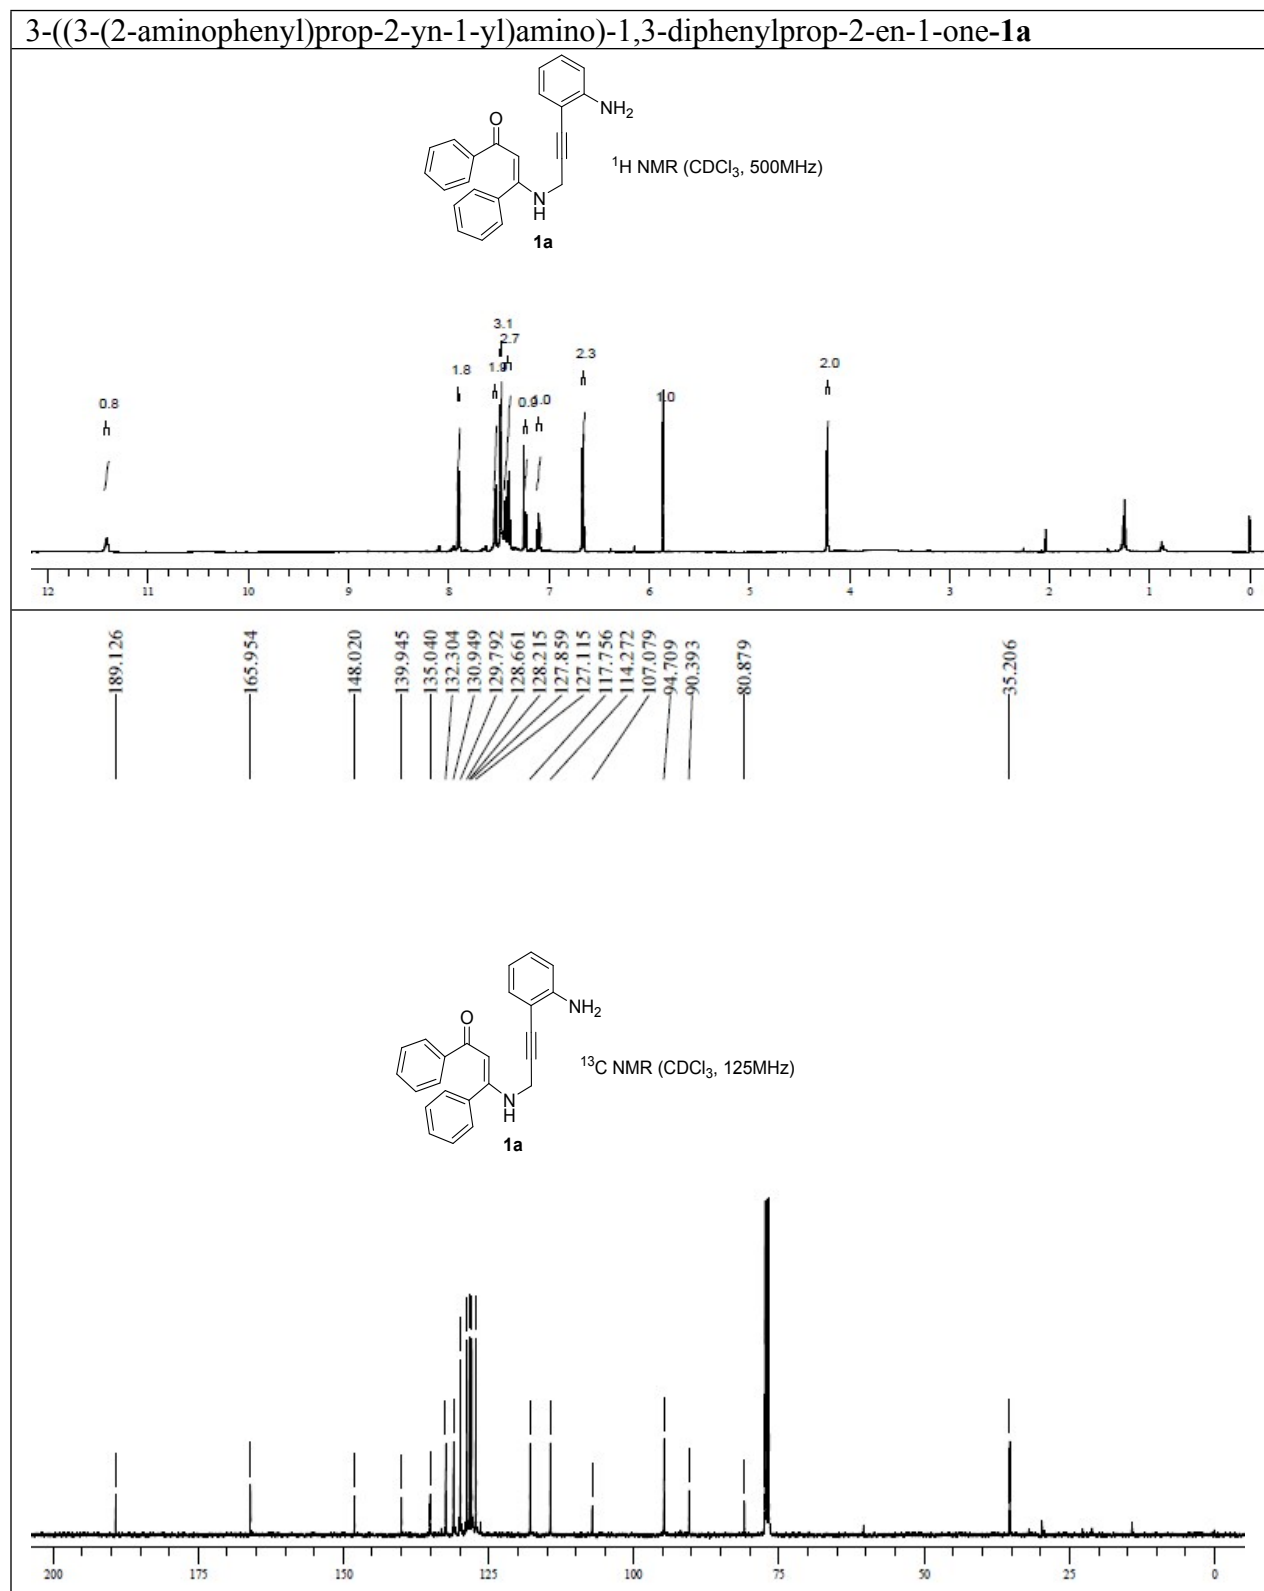

3-((3-(2-aminophenyl)prop-2-yn-1-yl)amino)-1-(naphthalen-2-yl)-3-phenylprop-2-en-1-one- **1b**

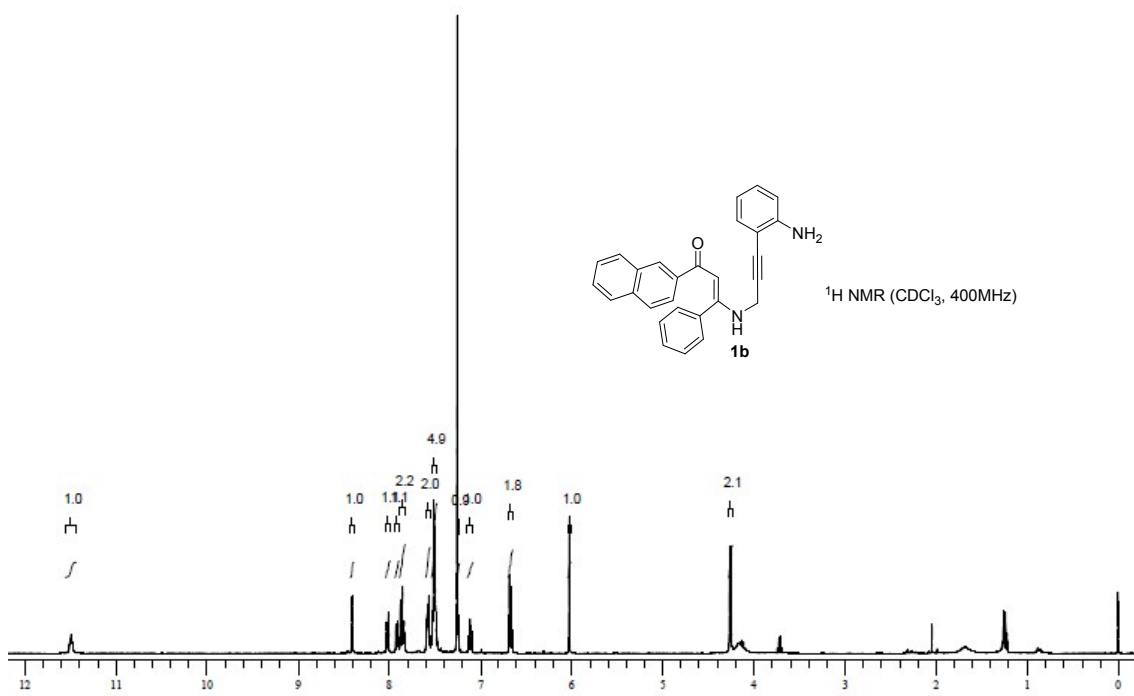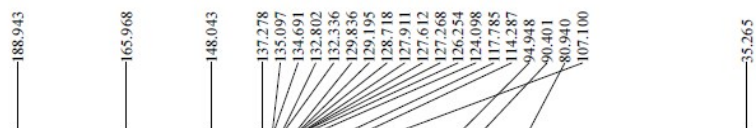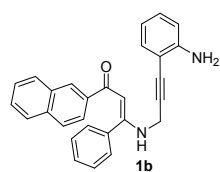

<sup>13</sup>C NMR (CDCl<sub>3</sub>, 100MHz)

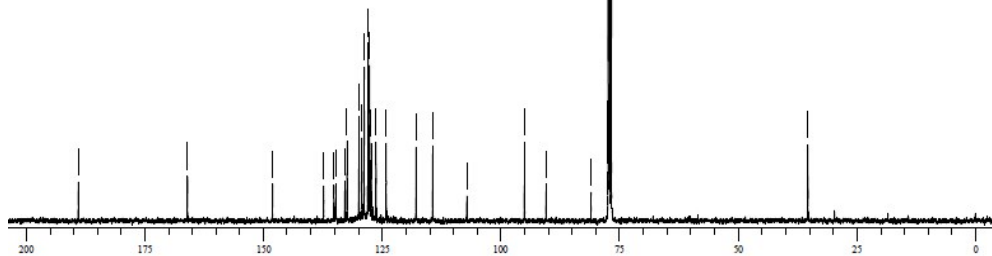

3-((3-(2-aminophenyl)prop-2-yn-1-yl)amino)-1-(2,4-dichlorophenyl)-3-phenylprop-2-en-1-one-1d

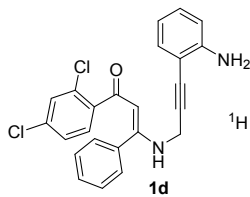

<sup>1</sup>H NMR (CDCl<sub>3</sub>, 400MHz)

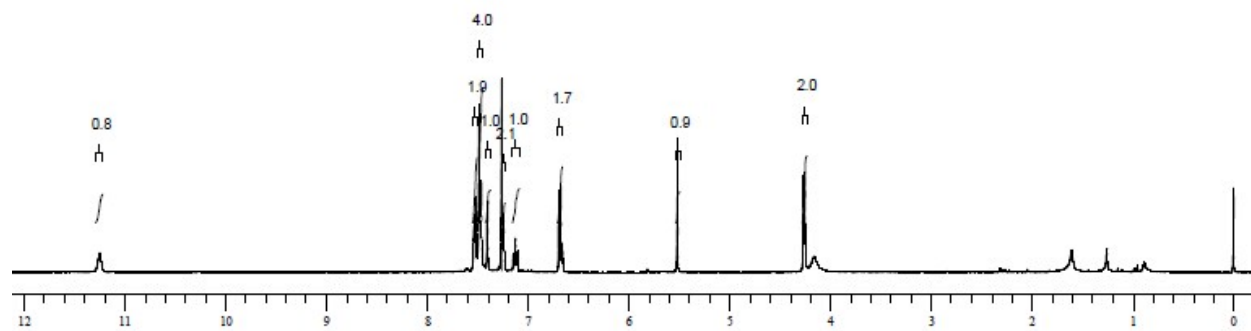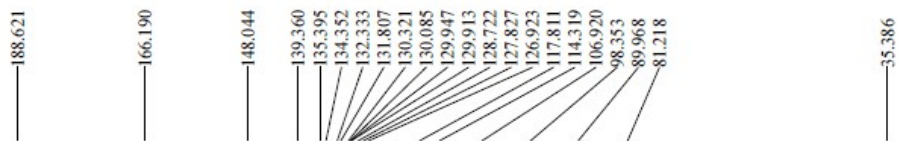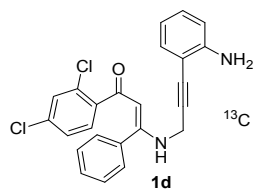

<sup>13</sup>C NMR (CDCl<sub>3</sub>, 100MHz)

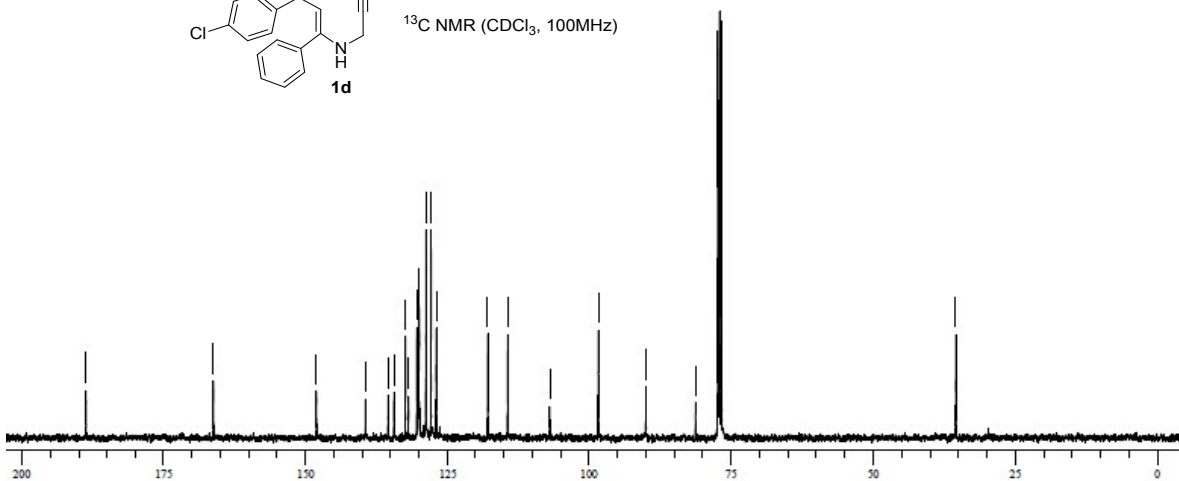

3-((3-(2-aminophenyl)prop-2-yn-1-yl)amino)-1-(4-methoxyphenyl)-3-phenylprop-2-en-1-one -**1h**

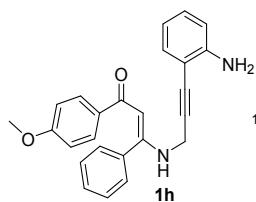

<sup>1</sup>H NMR (CDCl<sub>3</sub>, 500MHz)

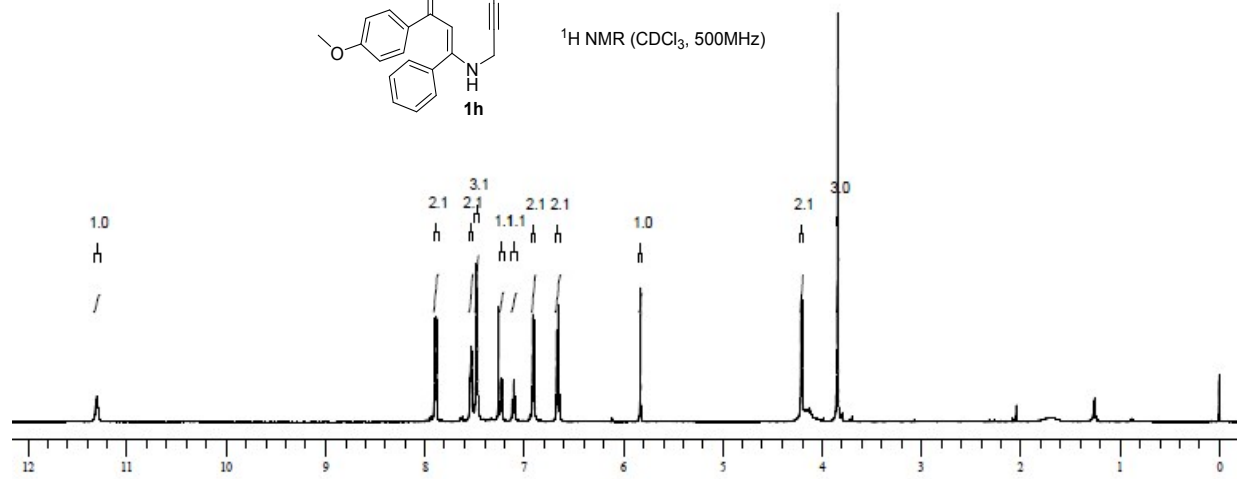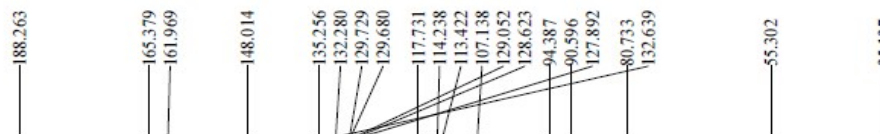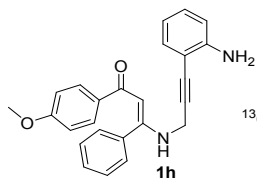

<sup>13</sup>C NMR (CDCl<sub>3</sub>, 100MHz)

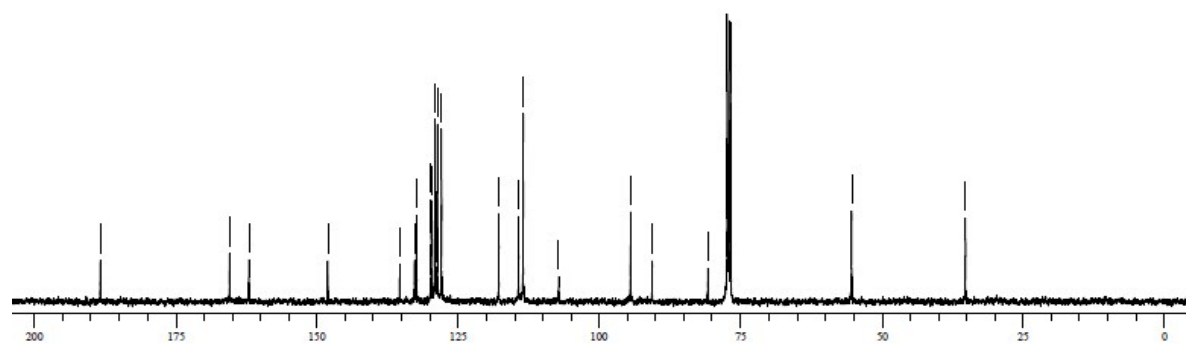

3-((3-(2-aminophenyl)prop-2-yn-1-yl)amino)-1-(4-(tert-butyl)phenyl)-3-phenylprop-2-en-1-one-**1i** :

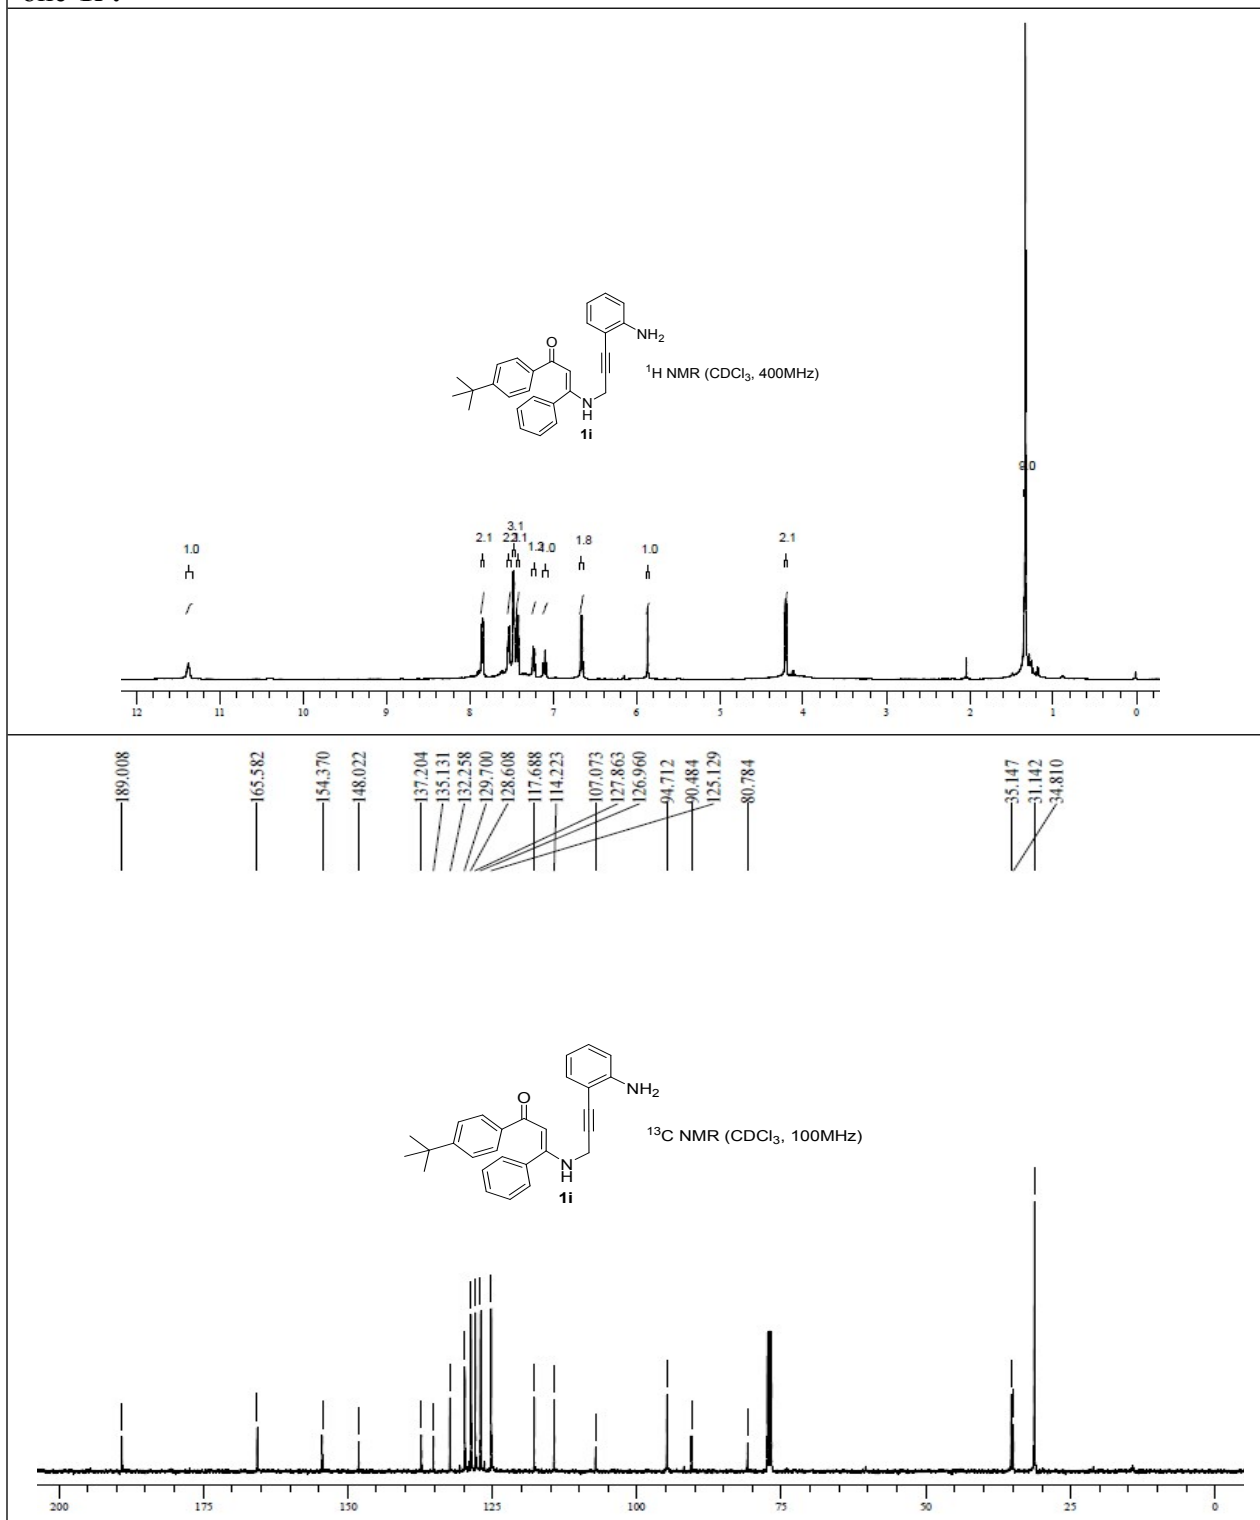



3-((3-(2-aminophenyl)prop-2-yn-1-yl)amino)-1-(4-bromophenyl)-3-(*p*-tolyl)prop-2-en-1-one 1k :

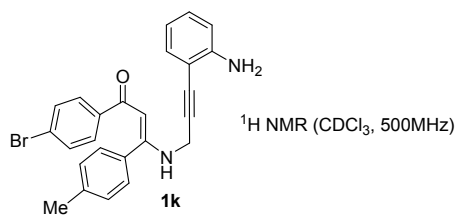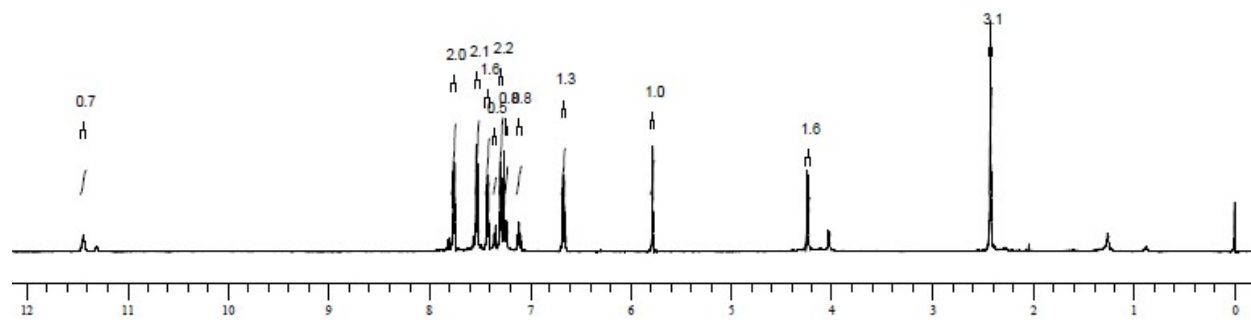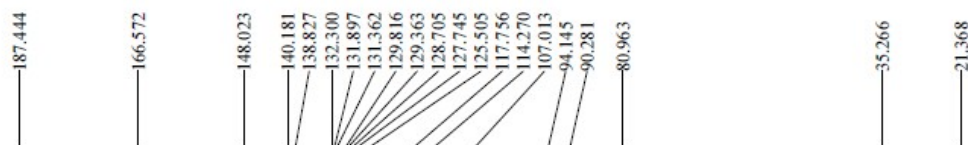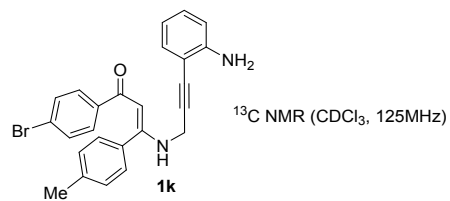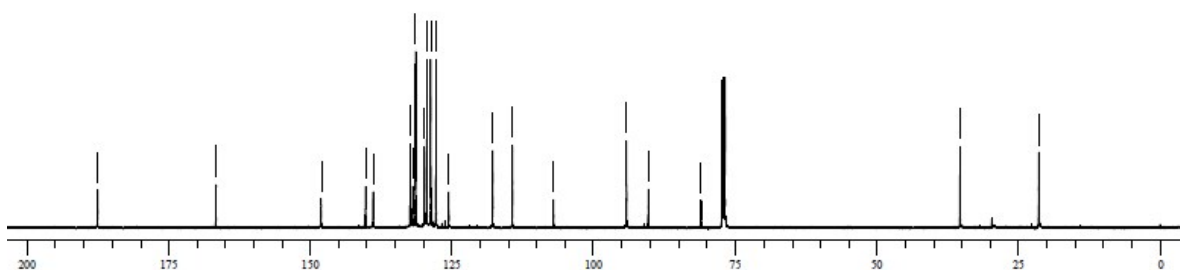

3-((3-(2-aminophenyl)prop-2-yn-1-yl)amino)-3-phenyl-1-(thiophen-2-yl)prop-2-en-1-one 1u :

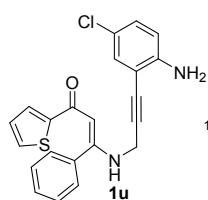

<sup>1</sup>H NMR (CDCl<sub>3</sub>, 400MHz)

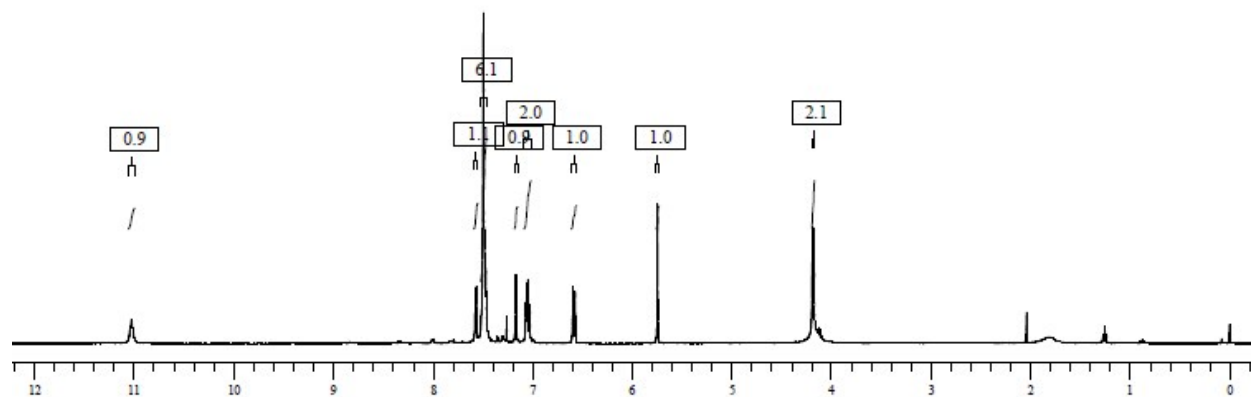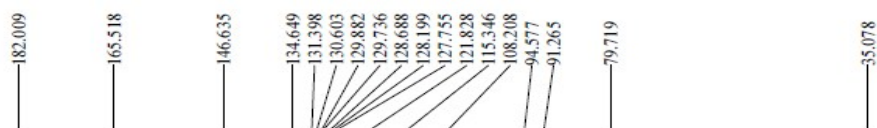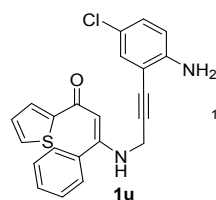

<sup>13</sup>C NMR (CDCl<sub>3</sub>, 100MHz)

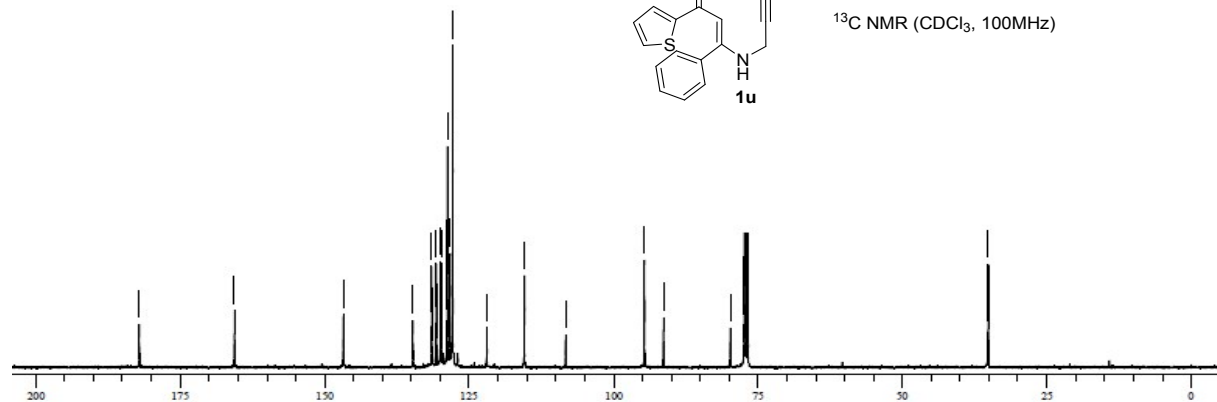

# 4,5-Diphenyl-1,2-dihydrobenzo[c][2,7]naphthyridine-2a

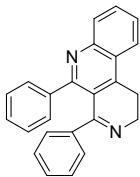

<sup>1</sup>H NMR (CDCl<sub>3</sub>, 400MHz)

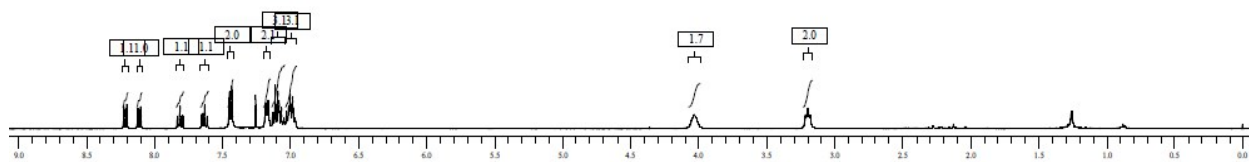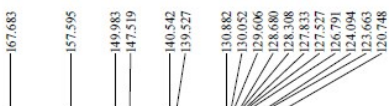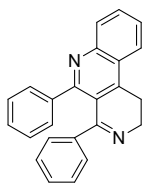

<sup>13</sup>C NMR (CDCl<sub>3</sub>, 100MHz)

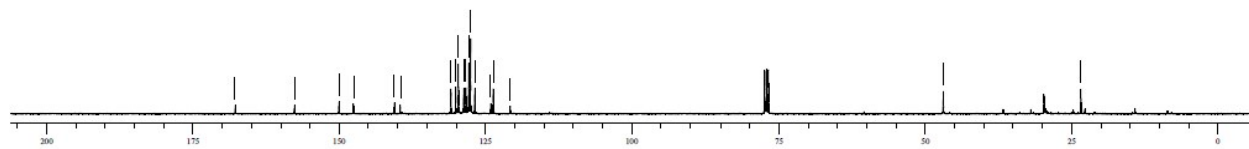

5-(Naphthalen-2-yl)-4-phenyl-1,2-dihydrobenzo[c][2,7]naphthyridine-2b

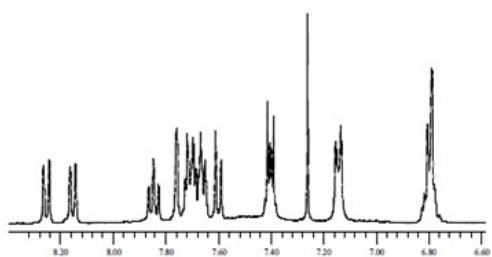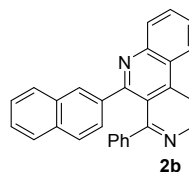

<sup>1</sup>H NMR (CDCl<sub>3</sub>, 500MHz)

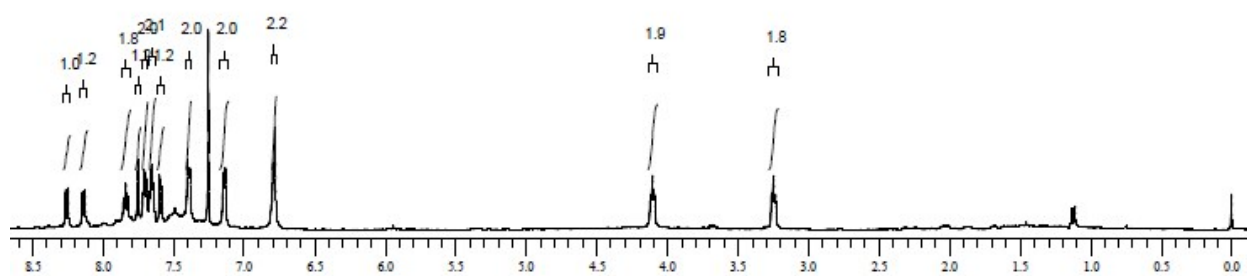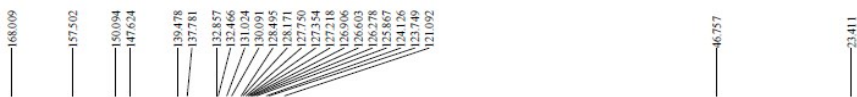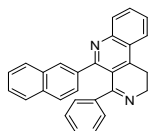

<sup>13</sup>C NMR (CDCl<sub>3</sub>, 125MHz)

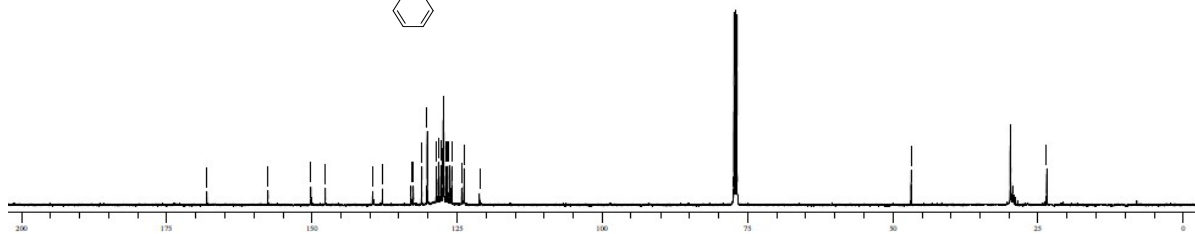

# 5-(4-Bromophenyl)-4-phenyl-1,2-dihydrobenzo[c][2,7]naphthyridine-2c

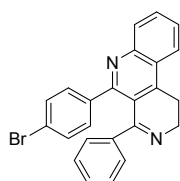

<sup>1</sup>H NMR (CDCl<sub>3</sub>, 400MHz)

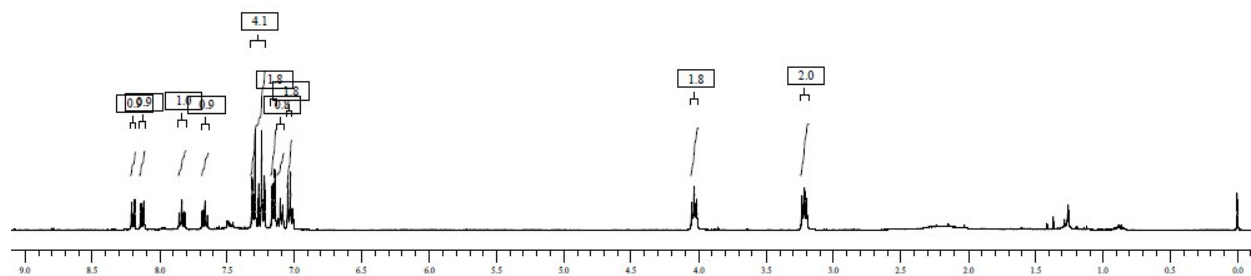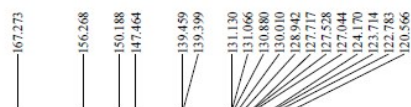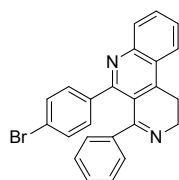

<sup>13</sup>C NMR (CDCl<sub>3</sub>, 100MHz)

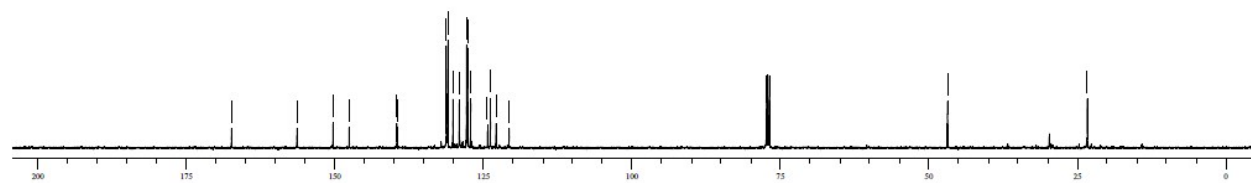

# 5-(2,4-Dichlorophenyl)-4-phenyl-1,2-dihydrobenzo[c][2,7]naphthyridine-2d

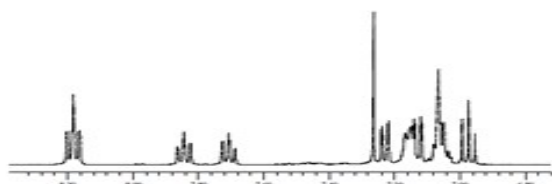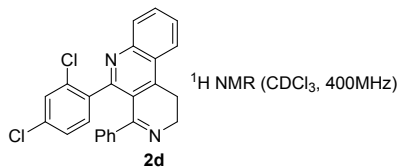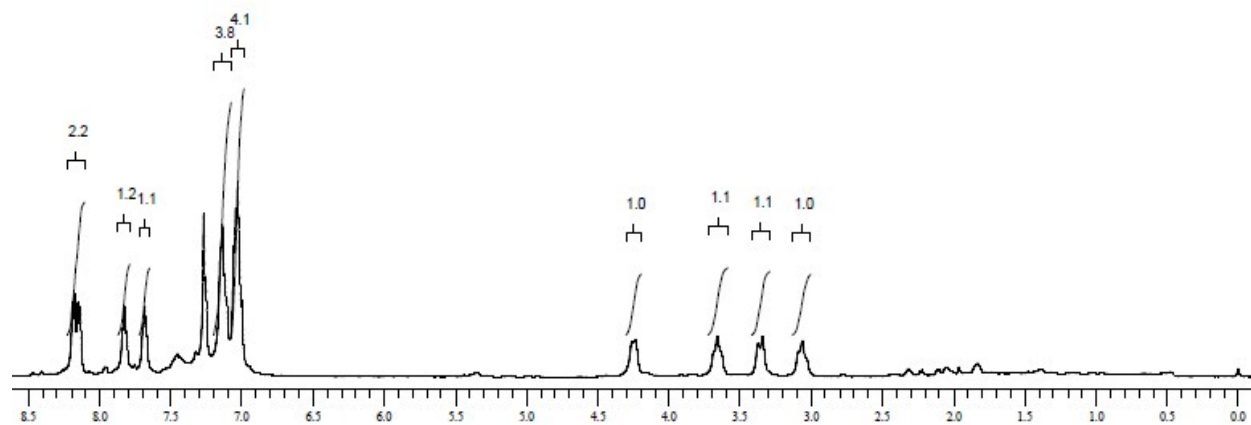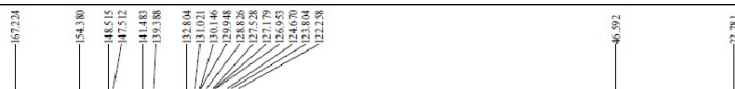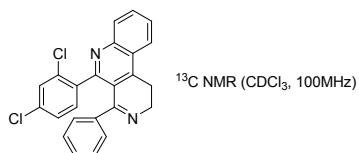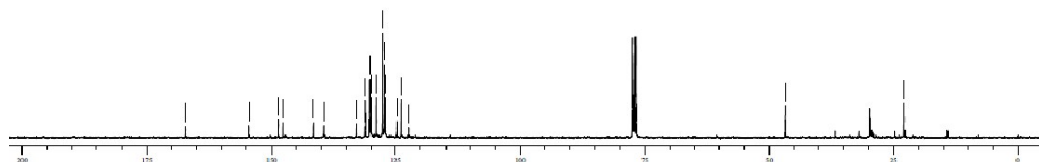

4-(4-Phenyl-1,2-dihydrobenzo[c][2,7]naphthyridin-5-yl)benzotrile-2e

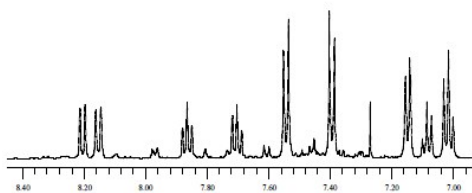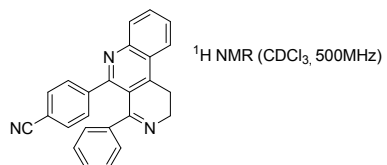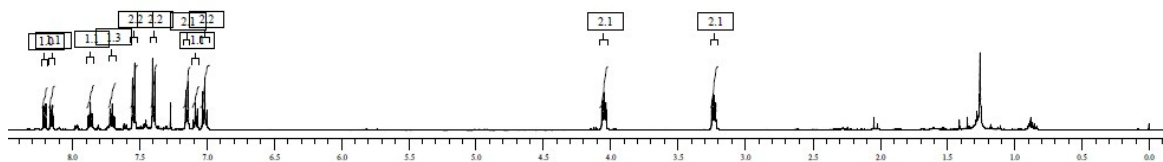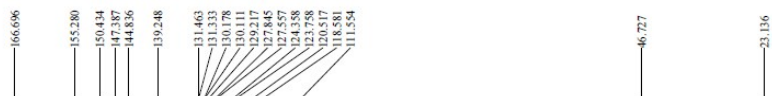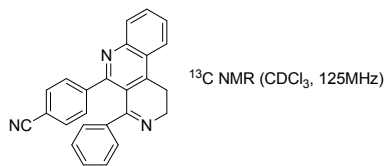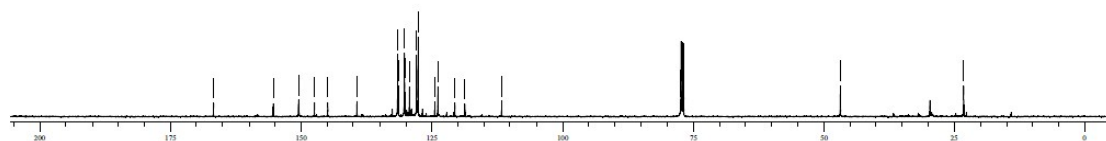

### 4-Phenyl-5-(4-(trifluoromethyl)phenyl)-1,2-dihydrobenzo[c][2,7]naphthyridine-2f

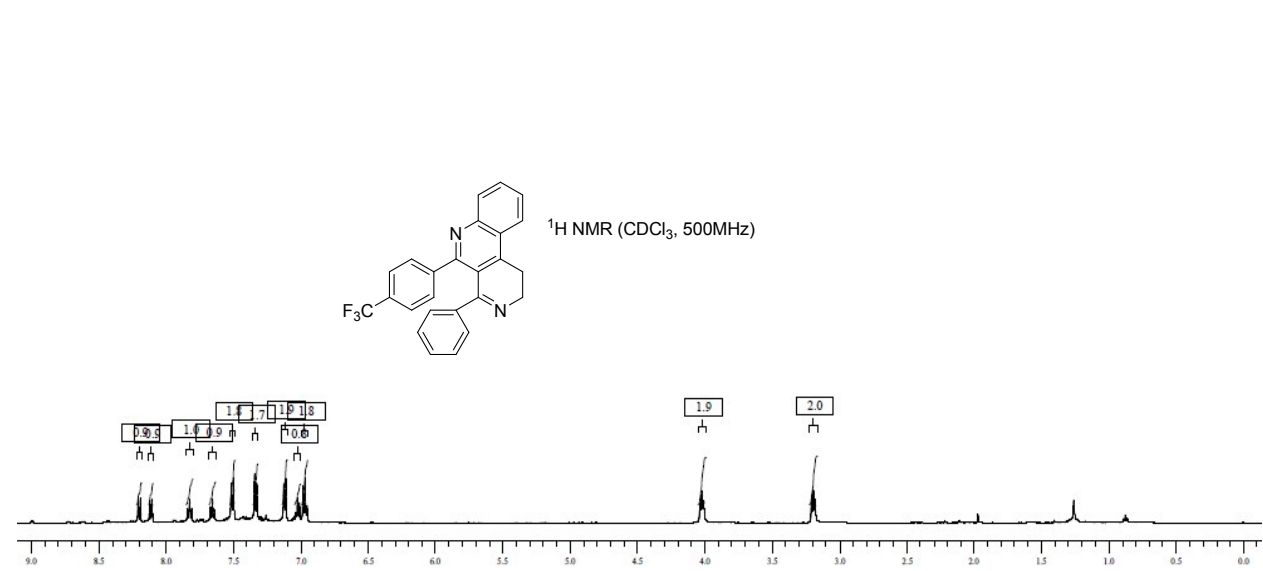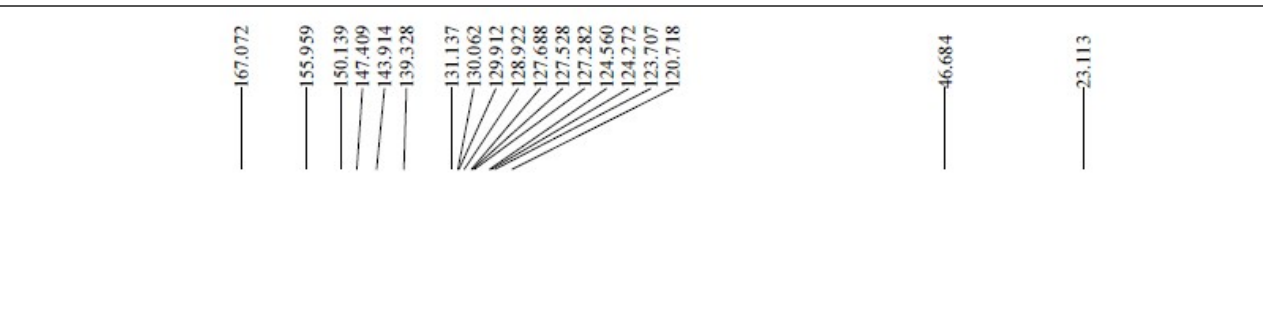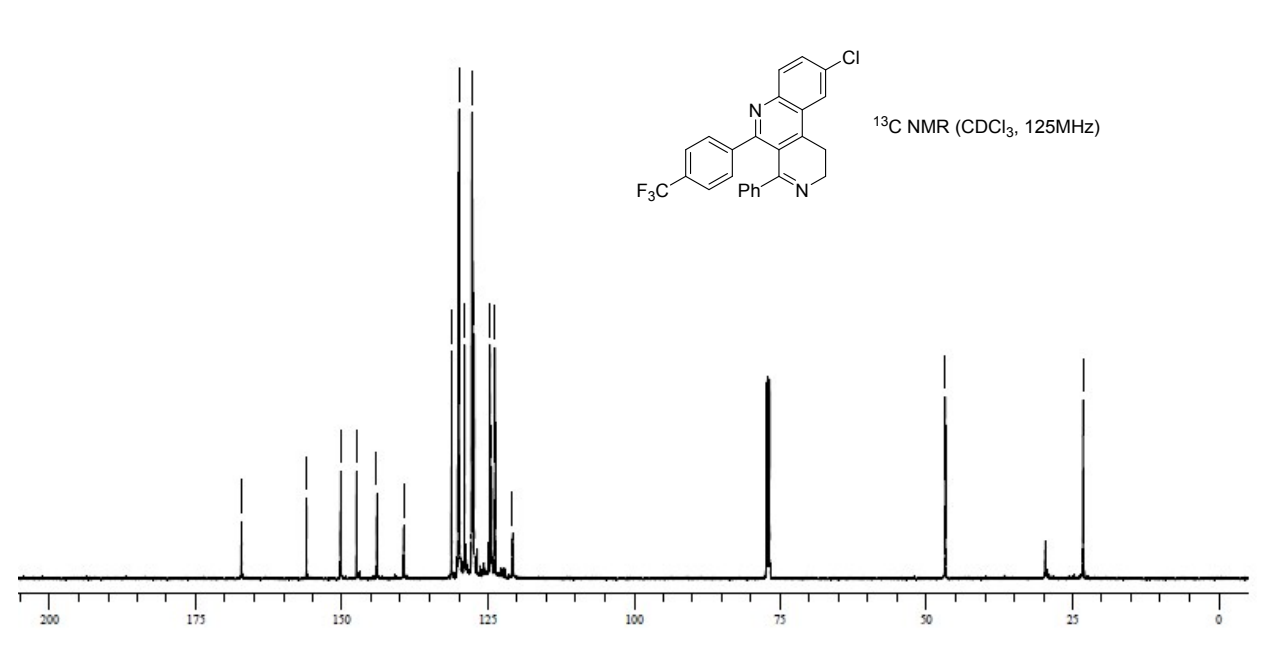



5-(4-Fluorophenyl)-4-phenyl-1,2-dihydrobenzo[c][2,7]naphthyridine-2g

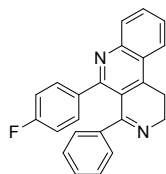

<sup>1</sup>H NMR (CDCl<sub>3</sub>, 400MHz)

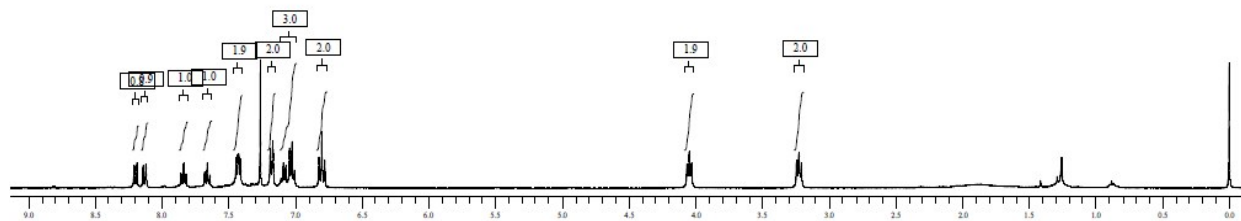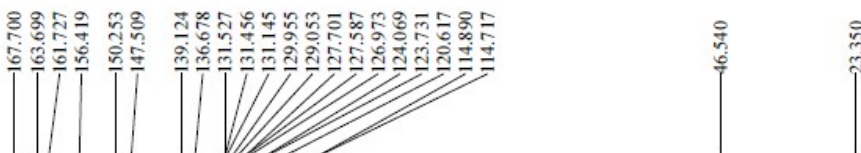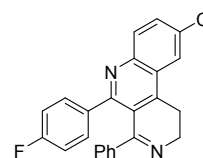

<sup>13</sup>C NMR (CDCl<sub>3</sub>, 125MHz)

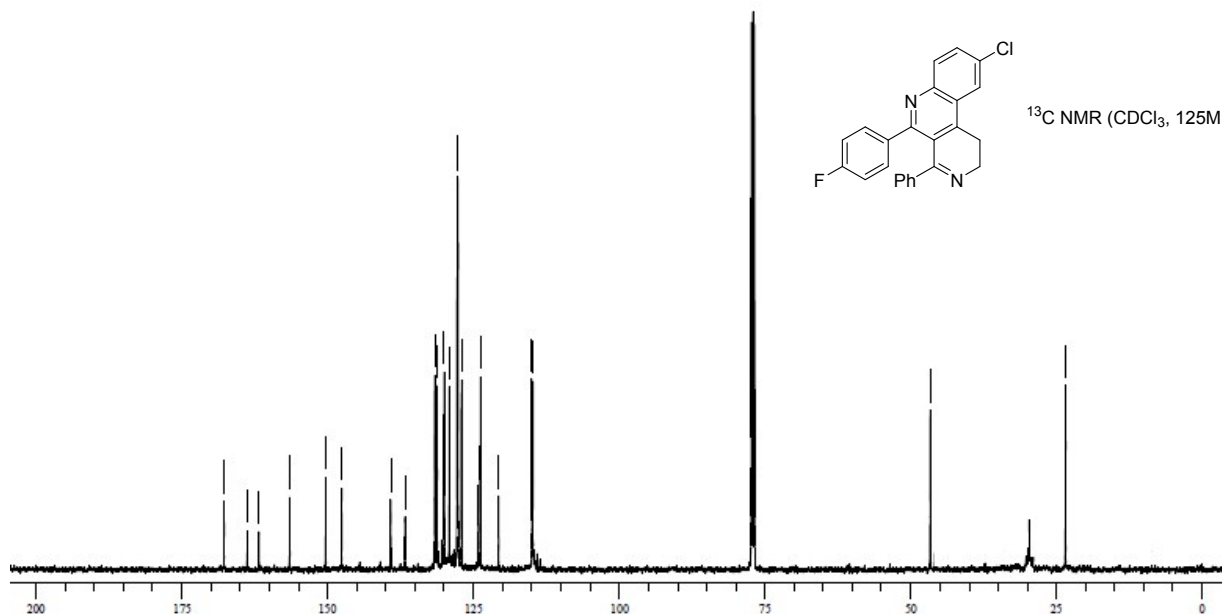

5-(4-Methoxyphenyl)-4-phenyl-1,2-dihydrobenzo[*c*][2,7]naphthyridine-2h

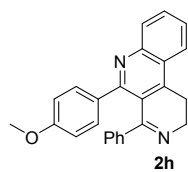

<sup>1</sup>H NMR (CDCl<sub>3</sub>, 400MHz)

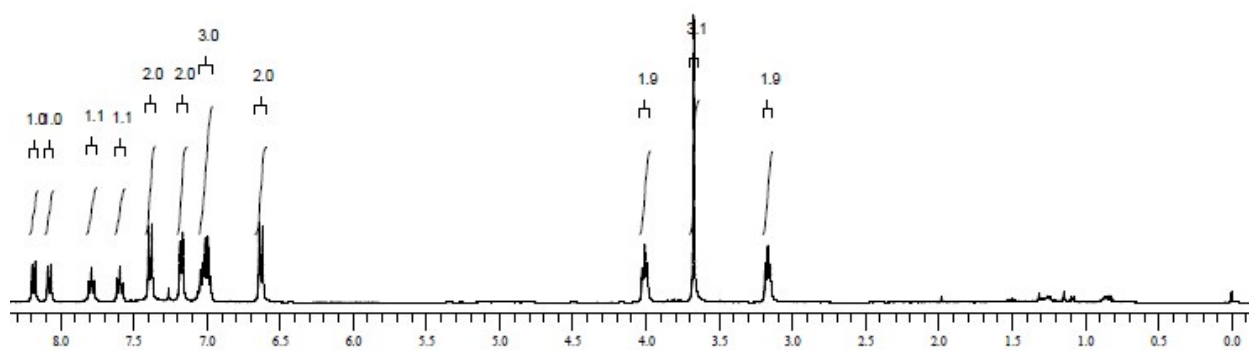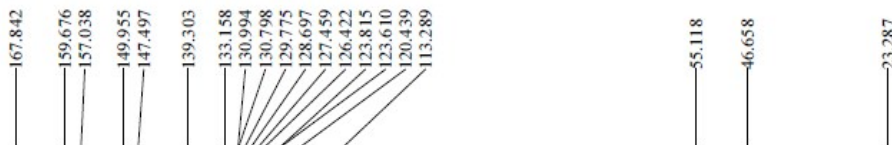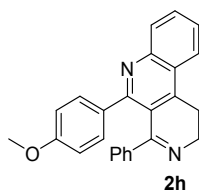

<sup>13</sup>C NMR (CDCl<sub>3</sub>, 100MHz)

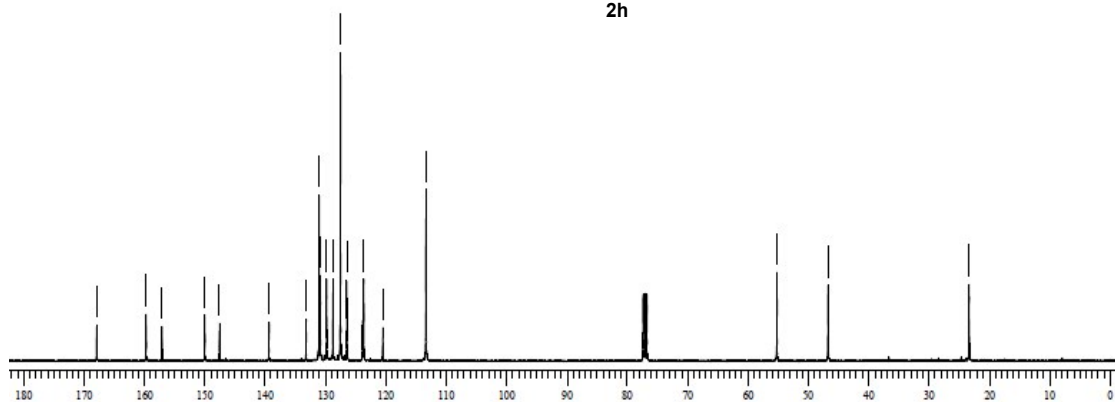

# 5-(4-(Tert-butyl)phenyl)-4-phenyl-1,2-dihydrobenzo[c][2,7]naphthyridine-2i

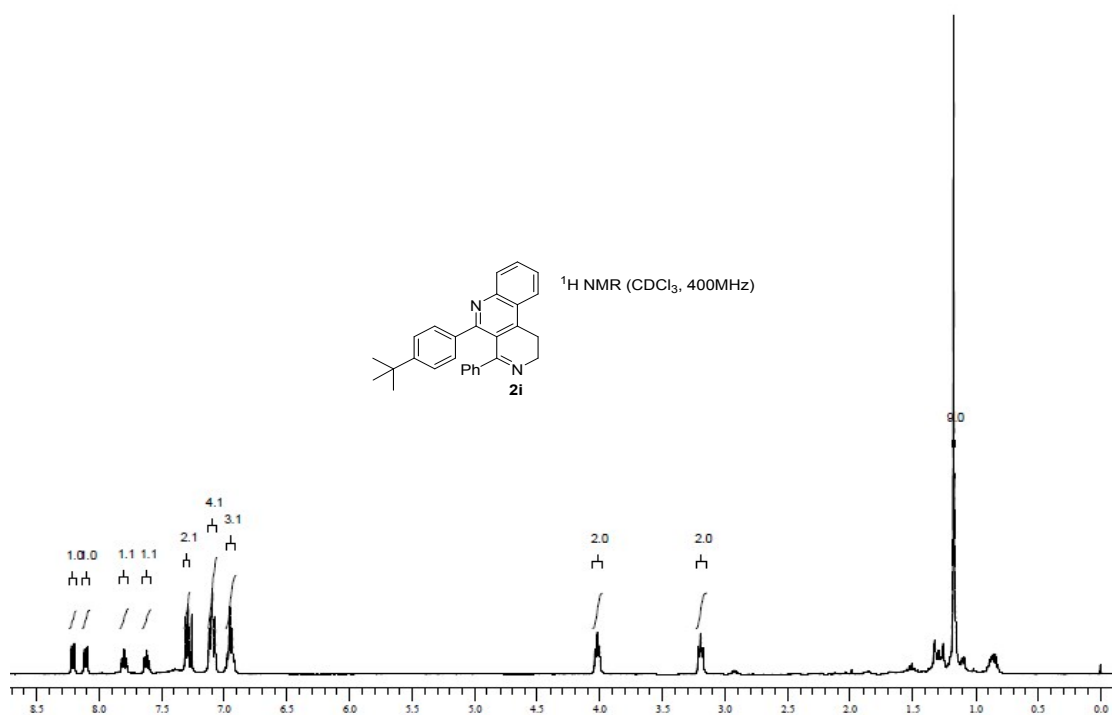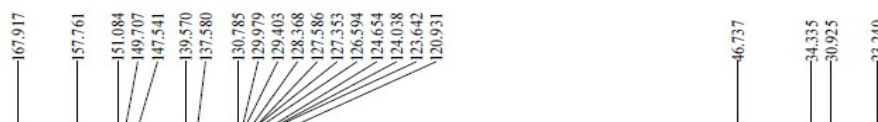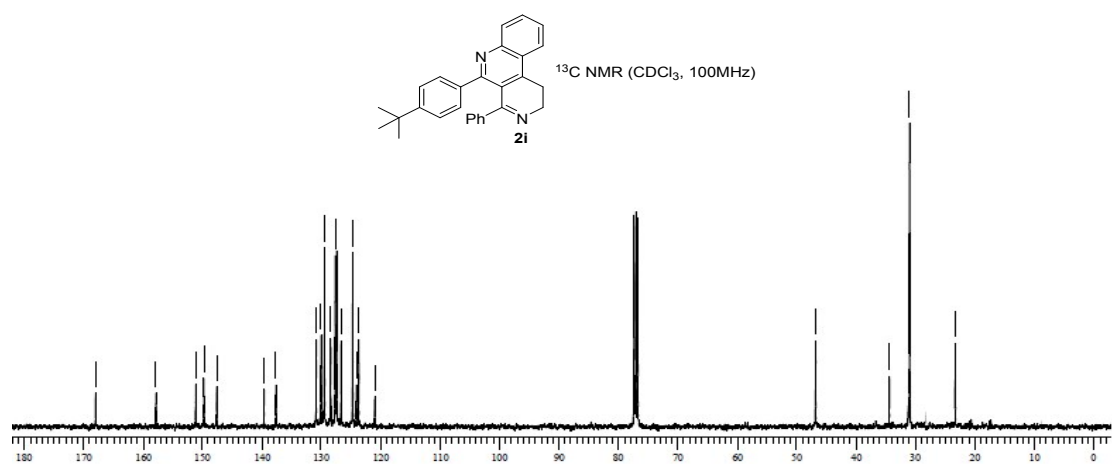

5-(4-Ethylphenyl)-4-(p-tolyl)-1,2-dihydrobenzo[c][2,7]naphthyridine-2j

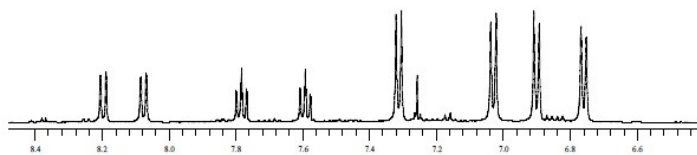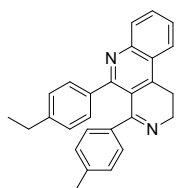

<sup>1</sup>H NMR (CDCl<sub>3</sub>, 500MHz)

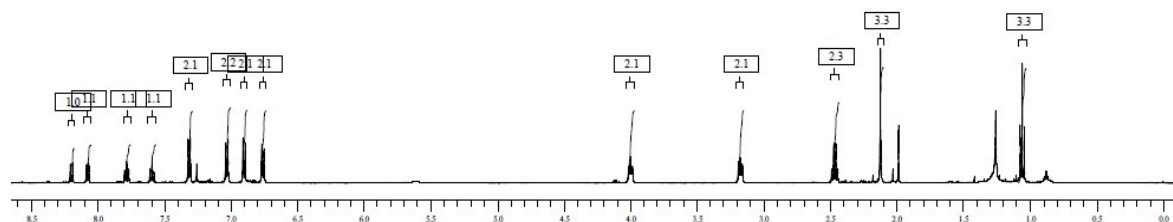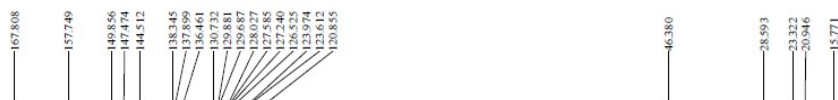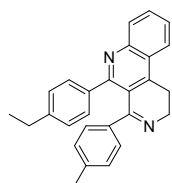

<sup>13</sup>C NMR (CDCl<sub>3</sub>, 125MHz)

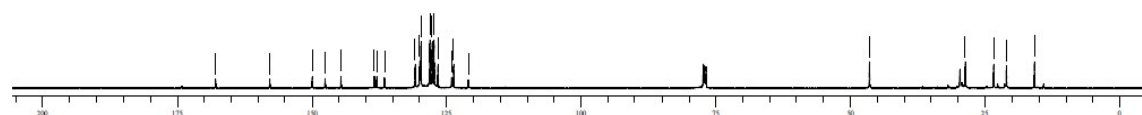

5-(4-Bromophenyl)-4-(p-tolyl)-1,2-dihydrobenzo[c][2,7]naphthyridine-2k

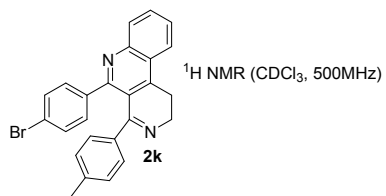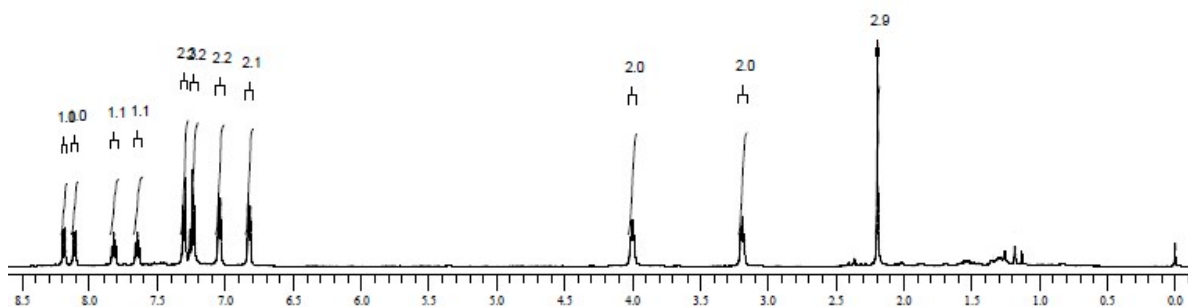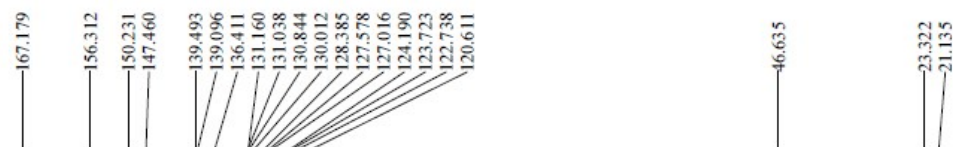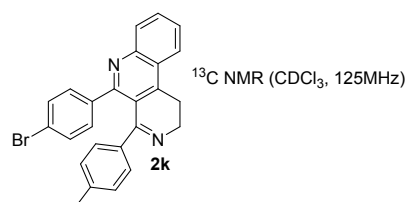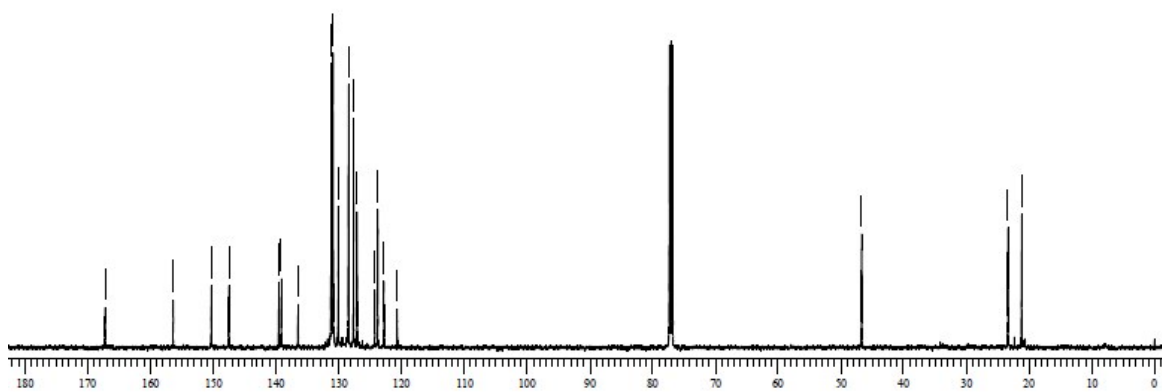

# 4-Phenyl-5-(thiophen-2-yl)-1,2-dihydrobenzo[c][2,7]naphthyridine-2l

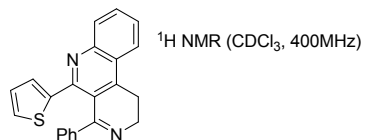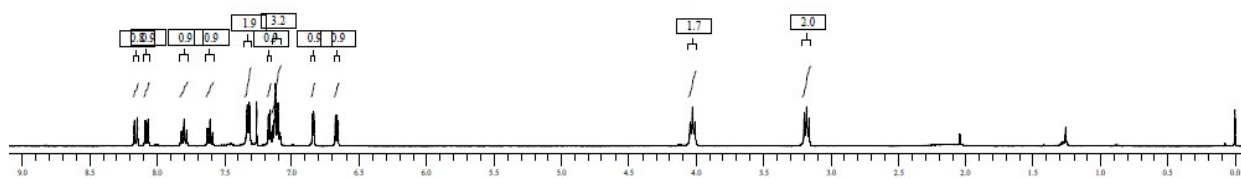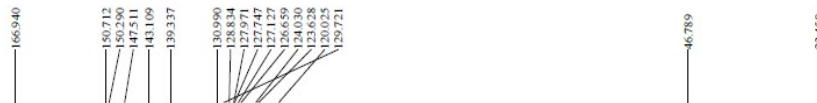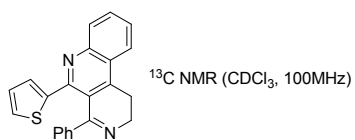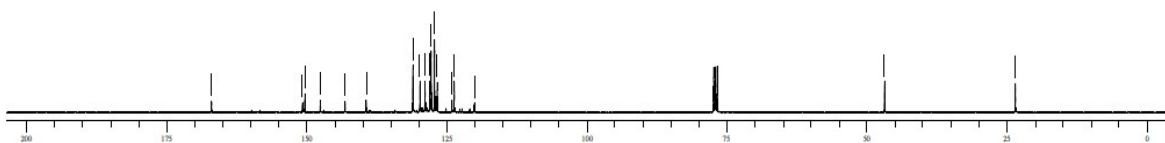

4-Pentyl-5-phenyl-1,2-dihydrobenzo[c][2,7]naphthyridine-2m

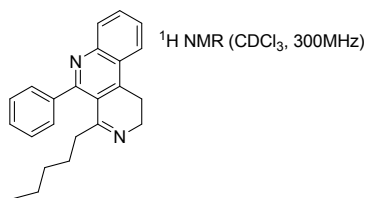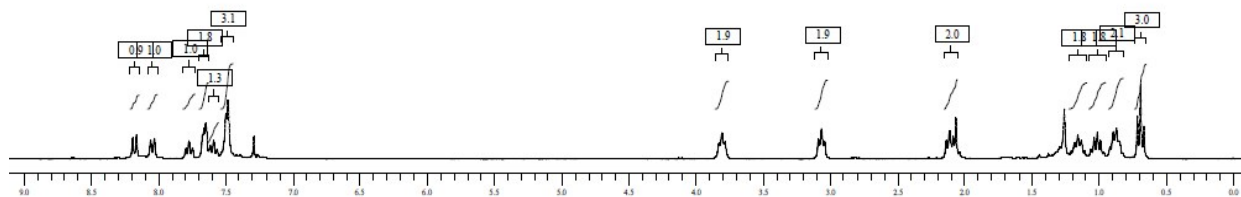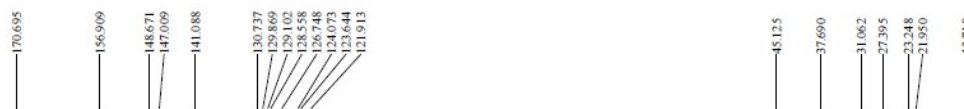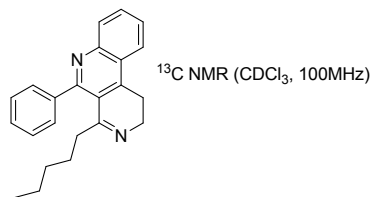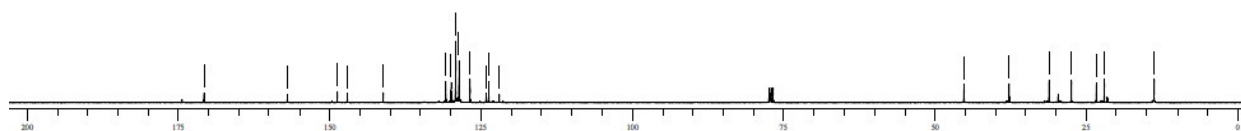

5-Cyclohexyl-4-phenyl-1,2-dihydrobenzo[c][2,7]naphthyridine-2n

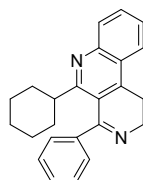

<sup>1</sup>H NMR (CDCl<sub>3</sub>, 400MHz)

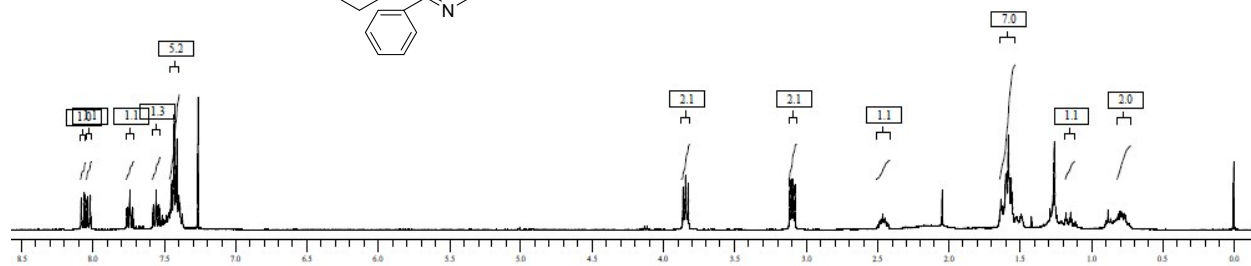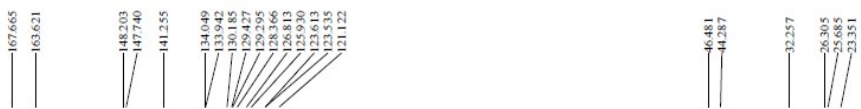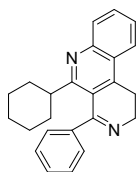

<sup>13</sup>C NMR (CDCl<sub>3</sub>, 125MHz)

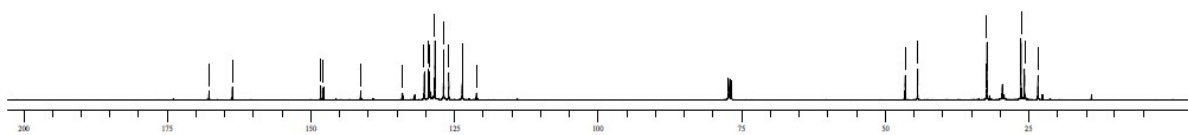



9-Methyl-4,5-diphenyl-1,2-dihydrobenzo[c][2,7]naphthyridine-2o

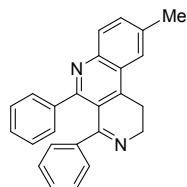

<sup>1</sup>H NMR (CDCl<sub>3</sub>, 400MHz)

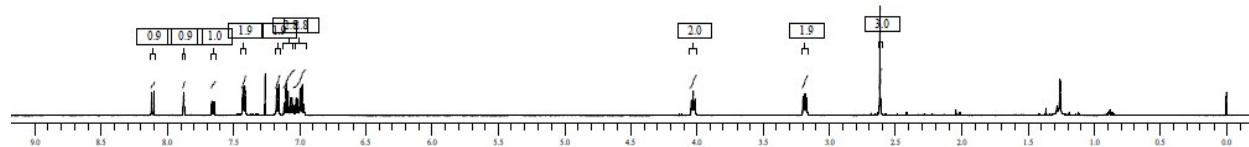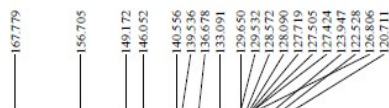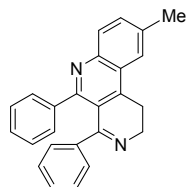

<sup>13</sup>C NMR (CDCl<sub>3</sub>, 125MHz)

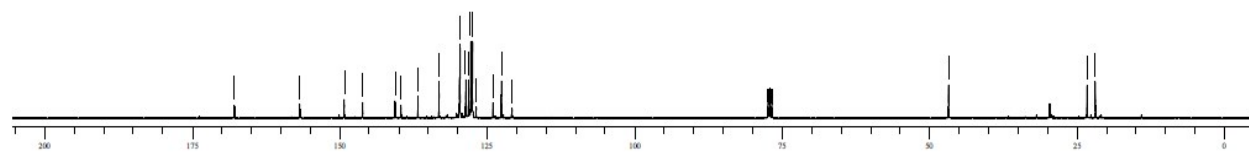

9-Methyl-5-(naphthalen-2-yl)-4-phenyl-1,2-dihydrobenzo[c][2,7]naphthyridine-2p

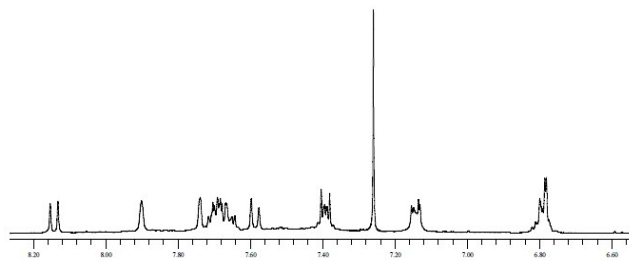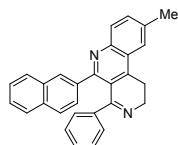

<sup>1</sup>H NMR (CDCl<sub>3</sub>, 400MHz)

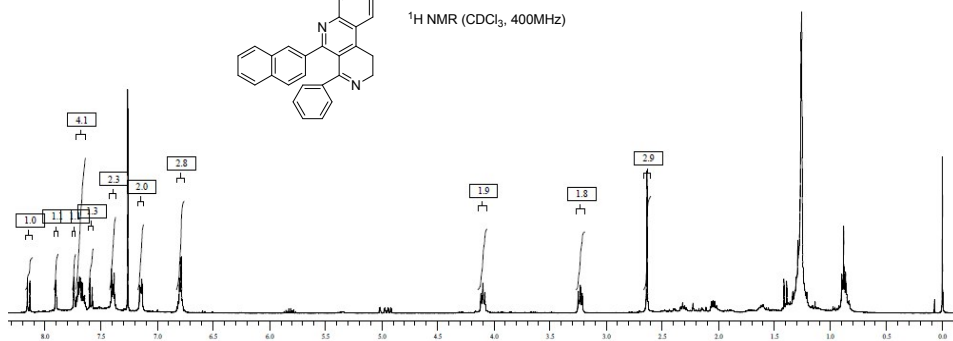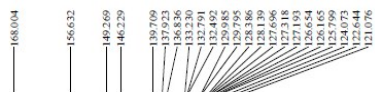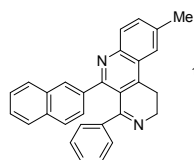

<sup>13</sup>C NMR (CDCl<sub>3</sub>, 100MHz)

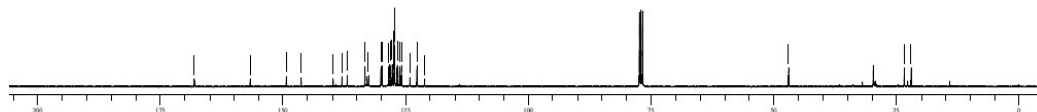

5-(4-Bromophenyl)-9-methyl-4-phenyl-1,2-dihydrobenzo[c][2,7]naphthyridine-2q

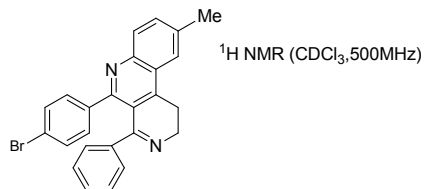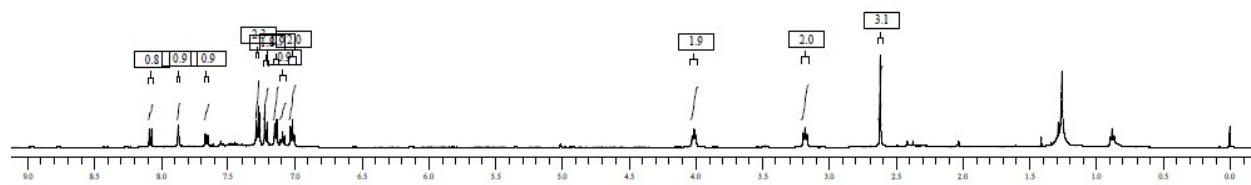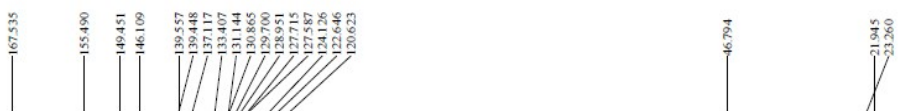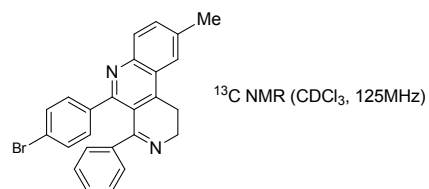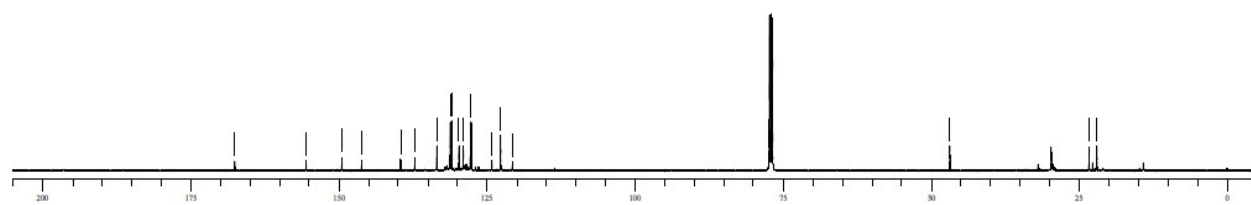

5-(4-Methoxyphenyl)-9-methyl-4-phenyl-1,2-dihydrobenzo[c][2,7]naphthyridine-2r

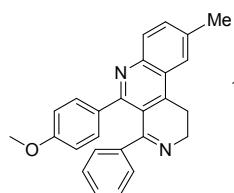

<sup>1</sup>H NMR (CDCl<sub>3</sub>, 400MHz)

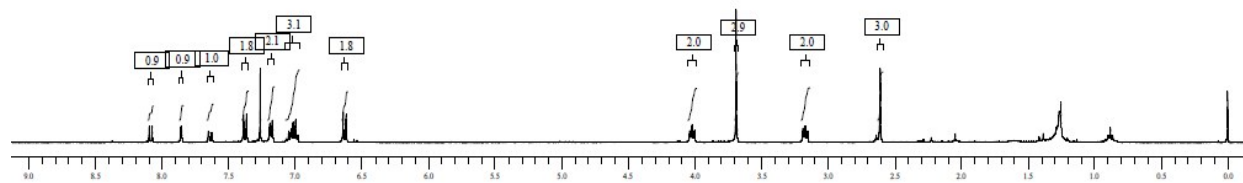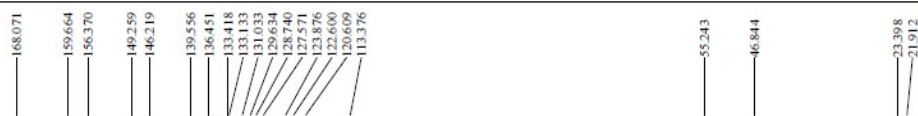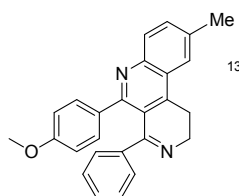

<sup>13</sup>C NMR (CDCl<sub>3</sub>, 100MHz)

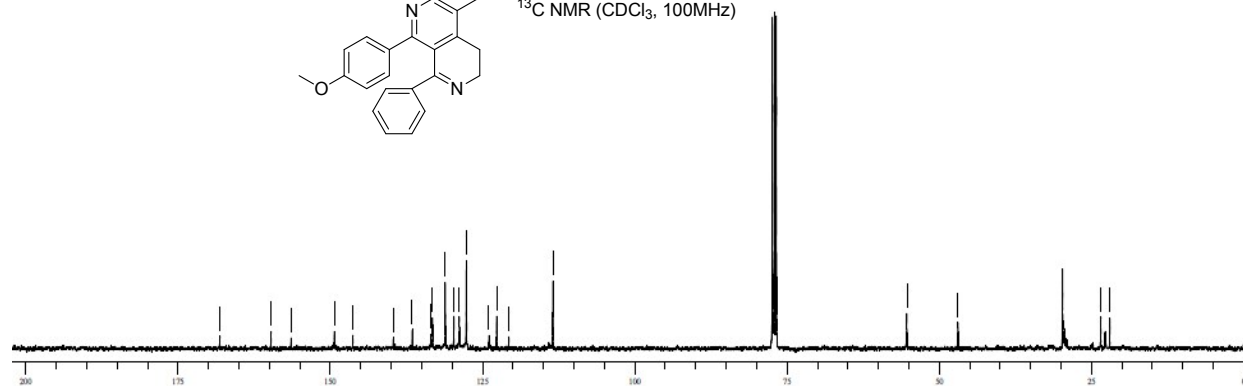

9-Chloro-4,5-diphenyl-1,2-dihydrobenzo[c][2,7]naphthyridine-2s

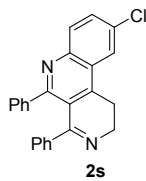

<sup>1</sup>H NMR (CDCl<sub>3</sub>, 400MHz)

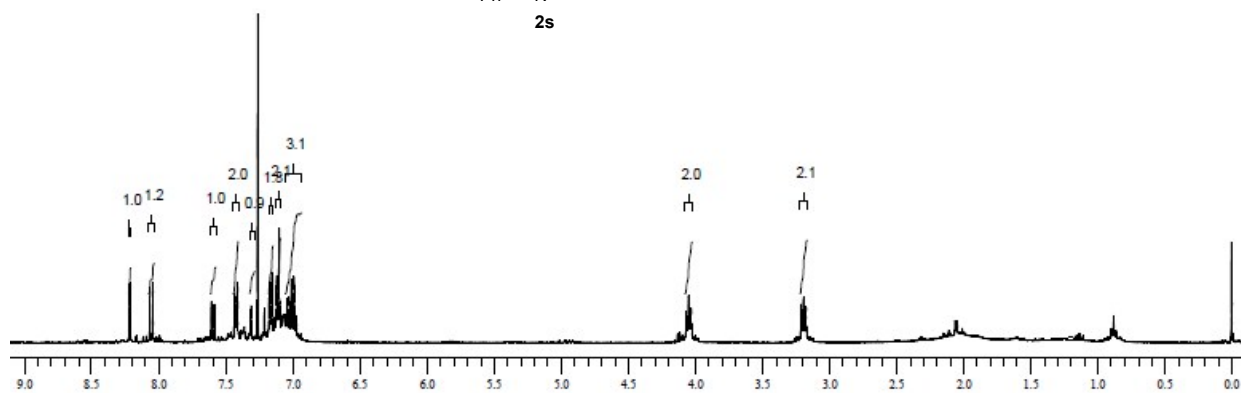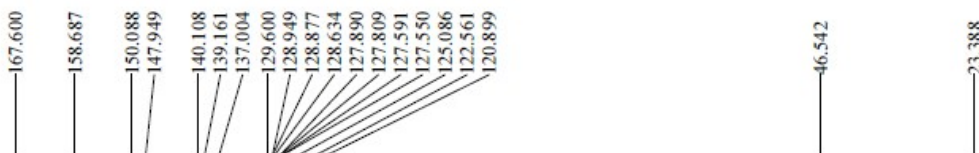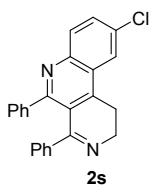

<sup>13</sup>C NMR (CDCl<sub>3</sub>, 125MHz)

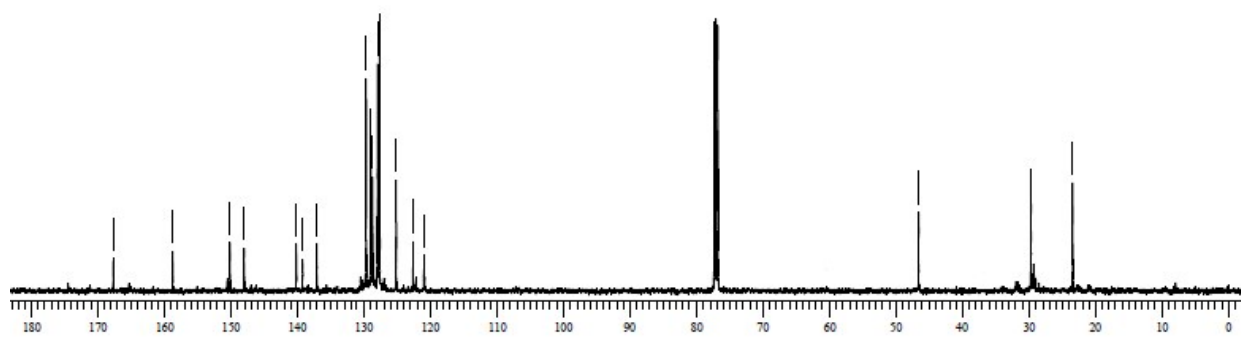

8-Chloro-9-methyl-4,5-diphenyl-1,2-dihydrobenzo[c][2,7]naphthyridine-2t

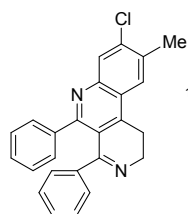

$^1\text{H NMR}$  ( $\text{CDCl}_3$ , 300MHz)

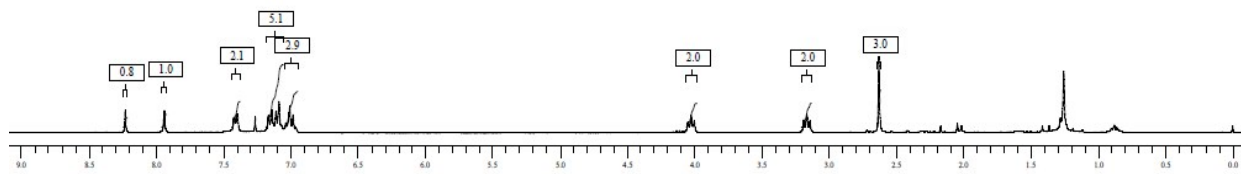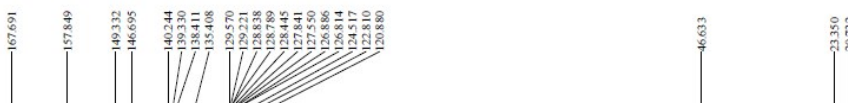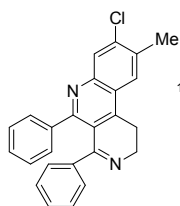

$^{13}\text{C NMR}$  ( $\text{CDCl}_3$ , 100MHz)

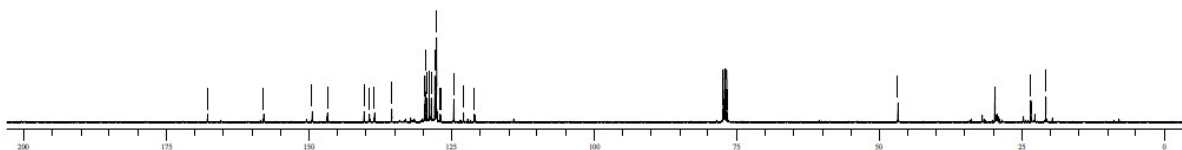

9-Chloro-4-phenyl-5-(thiophen-2-yl)-1,2-dihydrobenzo[*c*][2,7]naphthyridine-2u

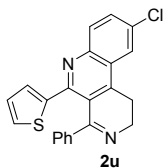

<sup>1</sup>H NMR (CDCl<sub>3</sub>, 400MHz)

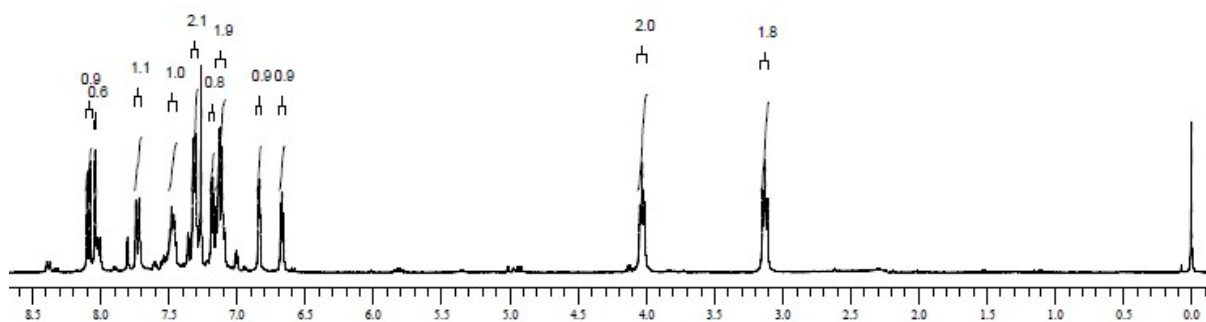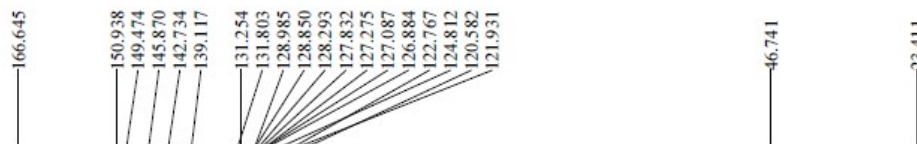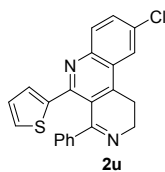

<sup>13</sup>C NMR (CDCl<sub>3</sub>, 125MHz)

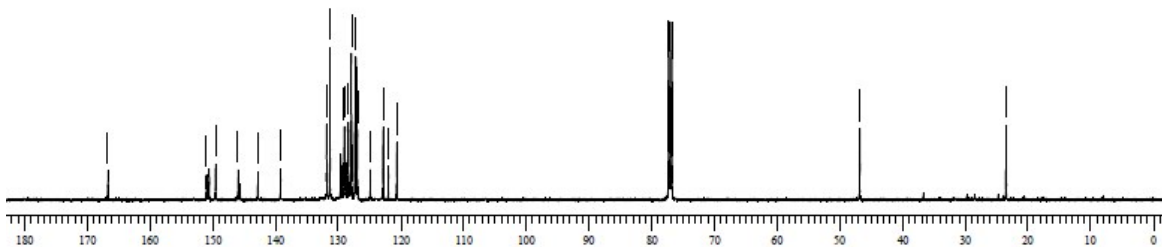

8-Chloro-9-methyl-4-phenyl-5-(thiophen-2-yl)-1,2-dihydrobenzo[c][2,7]naphthyridine-2v

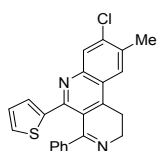

$^1\text{H NMR}$  ( $\text{CDCl}_3$ , 500MHz)

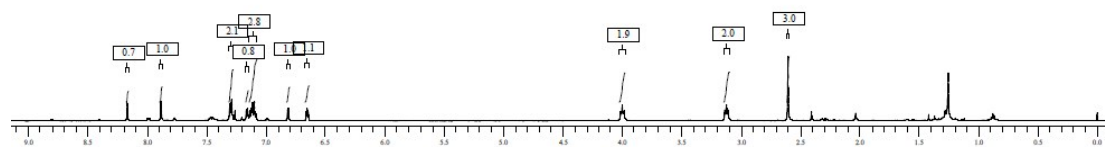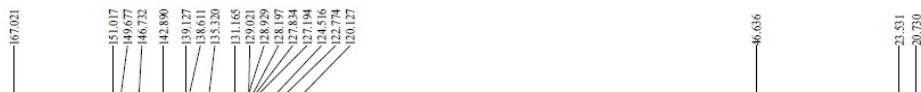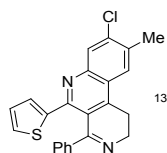

$^{13}\text{C NMR}$  ( $\text{CDCl}_3$ , 100MHz)

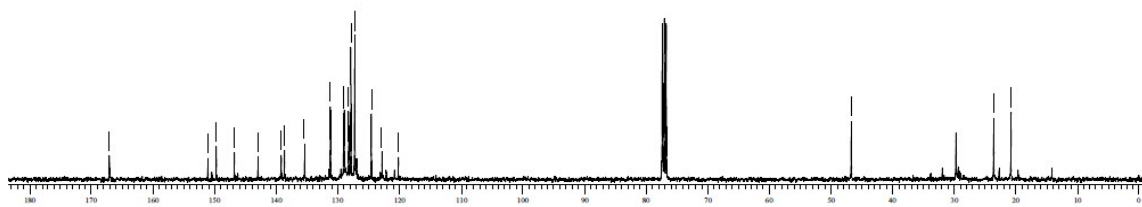



## 1.7 X-ray crystallography data of **2v**

X-ray data for the compounds were collected at room temperature using a Bruker Smart Apex CCD diffractometer with graphite monochromated MoK $\alpha$  radiation ( $\lambda=0.71073\text{\AA}$ ) with  $\omega$ -scan method.<sup>2</sup> Preliminary lattice parameters and orientation matrices were obtained from four sets of frames. Integration and scaling of intensity data were accomplished using SAINT program. The structure was solved by direct methods using SHELXS and refinement was carried out by full-matrix least-squares technique using SHELXL.<sup>3</sup> Anisotropic displacement parameters were included for all non-hydrogen atoms. H atoms were positioned geometrically and treated as riding on their parent C atoms [C-H = 0.93-0.97  $\text{\AA}$  and  $U_{\text{iso}}(\text{H}) = 1.5U_{\text{eq}}(\text{C})$  for methyl H or  $1.2U_{\text{eq}}(\text{c})$  for other H atoms]. The methyl groups were allowed to rotate but not to tip.

Crystal Data for **2v** (BE02):  $\text{C}_{23}\text{H}_{17}\text{N}_2\text{SCl}$  ( $M=388.92$  g/mol): monoclinic, space group  $P2_1/c$  (no. 14),  $a = 8.3120(5)$   $\text{\AA}$ ,  $b = 10.2393(7)$   $\text{\AA}$ ,  $c = 21.6965(14)$   $\text{\AA}$ ,  $\beta = 97.053(1)^\circ$ ,  $V = 1832.6(2)$   $\text{\AA}^3$ ,  $Z = 4$ ,  $T = 294.15$  K,  $\mu(\text{Mo K}\alpha) = 0.333$   $\text{mm}^{-1}$ ,  $D_{\text{calc}} = 1.4095$   $\text{g/cm}^3$ , 20958 reflections measured ( $4.4^\circ \leq 2\Theta \leq 56.44^\circ$ ), 4434 unique ( $R_{\text{int}} = 0.0247$ ,  $R_{\text{sigma}} = 0.0202$ ) which were used in all calculations. The final  $R_1$  was 0.0470 ( $I > 2\sigma(I)$ ) and  $wR_2$  was 0.1282 (all data). CCDC 1526953 contains supplementary Crystallographic data for the structure. These data can be obtained free of charge at [www.ccdc.cam.ac.uk/conts/retrieving.html](http://www.ccdc.cam.ac.uk/conts/retrieving.html) [or from the Cambridge Crystallographic Data Centre (CCDC), 12 Union Road, Cambridge CB2 1EZ, UK; fax: +44(0) 1223 336 033; email: [deposit@ccdc.cam.ac.uk](mailto:deposit@ccdc.cam.ac.uk)].

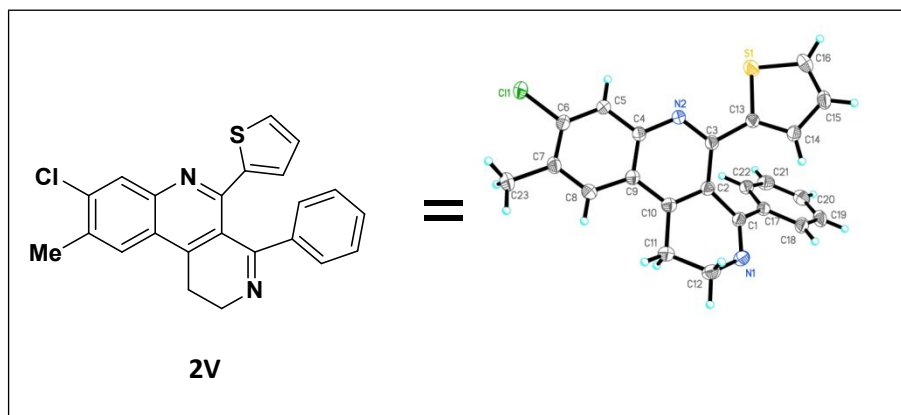

**Figure.1.** A view of compound **2v**, showing the atom-labelling scheme. Displacement ellipsoids are drawn at the 30% probability level and H atoms are represented by circles of arbitrary radii.

---

2. Bruker (2001). SAINT (Version 6.28a) & SMART (Version 5.625). Bruker AXS Inc., Madison, Wisconsin, USA.

3. Sheldrick G. M. (2015) *Acta Crystallogr C* 71: 3-8.
